# Supplementary material for: CuFe2O4 nanoparticles as a highly efficient and magnetically recoverable catalyst for the synthesis of medicinally privileged spiropyrimidine scaffolds
Source: Royal Society of Chemistry journal article supplement (doi:10.1039/c2ra22477a), 2012-12-19
Supplement: c2ra22477a.pdf [file c2ra22477a.pdf]

## CuFe<sub>2</sub>O<sub>4</sub> nanoparticles as a highly efficient and magnetically recoverable catalyst for the synthesis of medicinally privileged spiropyrimidine scaffolds

Anshu Dandia\*, Anuj K. Jain, Sonam Sharma  
Center for Advance Studies, Department of Chemistry  
University of Rajasthan, Jaipur-302004, India

### Supplementary data

| Contents:                                                             | Page No. |
|-----------------------------------------------------------------------|----------|
| 1. General Experimental Procedures                                    | 2-3      |
| 2. XRD patterns of CuFe <sub>2</sub> O <sub>4</sub> nanoparticles     | 4        |
| 3. SEM images of CuFe <sub>2</sub> O <sub>4</sub> nanoparticles       | 5        |
| 4. TEM images of CuFe <sub>2</sub> O <sub>4</sub> nanoparticles       | 6        |
| 5. EDAX spectrum of CuFe <sub>2</sub> O <sub>4</sub> nanoparticles    | 6        |
| 6. FT-IR spectrums of CuFe <sub>2</sub> O <sub>4</sub> nanoparticles  | 7-8      |
| 7. Spectral data of compounds <b>4 (a-o)</b>                          | 9-11     |
| 8. <sup>1</sup> H NMR spectrum of compound <b>4a</b>                  | 12       |
| 9. <sup>13</sup> C NMR spectrum of compound <b>4a</b>                 | 13       |
| 10. <sup>1</sup> H NMR spectrum of compound <b>4c</b>                 | 14       |
| 11. <sup>13</sup> C NMR spectrum of compound <b>4c</b>                | 15       |
| 12. Mass spectrum of compound <b>4c</b>                               | 16       |
| 13. <sup>1</sup> H NMR spectrum of compound <b>4d</b>                 | 17       |
| 14. <sup>13</sup> C NMR spectrum of compound <b>4d</b>                | 18       |
| 15. Mass spectrum of compound <b>4d</b>                               | 19       |
| 16. <sup>13</sup> C NMR spectrum of compound <b>4e</b>                | 20       |
| 17. <sup>1</sup> H NMR spectrum of compound <b>4f</b>                 | 21       |
| 18. <sup>1</sup> H NMR spectrum of compound <b>4f (Expanded view)</b> | 22       |
| 19. <sup>13</sup> C NMR spectrum of compound <b>4f</b>                | 23       |
| 20. <sup>1</sup> H NMR spectrum of compound <b>4h</b>                 | 24       |
| 21. <sup>13</sup> C NMR spectrum of compound <b>4h</b>                | 25       |
| 22. <sup>1</sup> H NMR spectrum of compound <b>4k</b>                 | 26       |
| 23. <sup>13</sup> C NMR spectrum of compound <b>4k</b>                | 27       |
| 24. <sup>1</sup> H NMR spectrum of compound <b>4l</b>                 | 28       |
| 25. <sup>13</sup> C NMR spectrum of compound <b>4l</b>                | 29       |
| 26. <sup>1</sup> H NMR spectrum of compound <b>4m</b>                 | 30       |
| 27. <sup>13</sup> C NMR spectrum of compound <b>4m</b>                | 31       |
| 28. <sup>13</sup> C NMR spectrum of compound <b>4o</b>                | 32       |
| 29. ORTEP diagram of compound <b>4k</b>                               | 33       |

## Experimental Procedures

### 1 General

All the chemicals used were of research grade and were used without further purification. The melting points of all compounds were determined on a Toshniwal apparatus. The purity of compounds was checked on thin layers of silica Gel-G coated glass plates and n-hexane: ethyl acetate (8:2) as eluent. IR spectra were recorded on a Shimadzu FT IR-8400S spectrophotometer using KBr pellets.  $^1\text{H}$  and  $^{13}\text{C}$  NMR spectra were recorded in  $\text{CDCl}_3$  using TMS as an internal standard on a Bruker spectrophotometer at 300 and 75 MHz respectively. Mass spectrums of representative compounds were recorded on JEOL-SX-102 Mass spectrometer at 70 eV. Elemental microanalyses were carried out on a Carlo-Erba 1108 CHN analyzer. Single crystal X-ray diffraction was performed on a Bruker Kappa Apex II instrument.

### 2 Preparation $\text{CuFe}_2\text{O}_4$ nanoparticles

$\text{CuFe}_2\text{O}_4$  nanoparticles were prepared by thermal decomposition of  $\text{Cu}(\text{NO}_3)_2$  and  $\text{Fe}(\text{NO}_3)_3$  in water in the presence of sodium hydroxide. Briefly, to a solution of  $\text{Fe}(\text{NO}_3)_3 \cdot 9\text{H}_2\text{O}$  (3.34 g, 8.2 mmol) and  $\text{Cu}(\text{NO}_3)_2 \cdot 3\text{H}_2\text{O}$  (1 g, 4.1 mmol) in 75 ml of distilled water, 3 g (75 mmol) of NaOH dissolved in 15 ml of water was added at room temperature over a period of 10 min. during which reddish-black precipitate was formed. Then the reaction mixture was warmed to  $90^\circ\text{C}$  and stirred under ultrasonic irradiation for two hours. After 2 h, it was cooled to room temperature and the magnetic particles so formed were separated by a magnetic separator. It was then washed with water (3 X 30 ml) and catalyst was kept in air oven for overnight at  $80^\circ\text{C}$ . Then the catalyst was ground in a mortar-pestle and kept in a furnace at  $700^\circ\text{C}$  for 5 h (step up temperature  $20^\circ\text{C}/\text{min}$ ) and then cooled to room temperature. 930 mg of magnetic  $\text{CuFe}_2\text{O}_4$  particles of size 35-50 nm were obtained.

### 3 Catalyst characterizations

The wide angle X-ray diffraction pattern of the sample was obtained using Bragg-Brentano geometry on PANalytical X'pert pro diffractometer in  $2\Theta$  range of  $20\text{-}70^\circ$  with Cu-K $\alpha$  radiation source ( $\lambda = 1.5406 \text{ \AA}$ ). The X-ray tube was operated at 45 kV and 40 mA. TEM measurements of the sample were carried out using a JEOL transmission electron microscope. Sample for the TEM was prepared by making a clear dispersion of nanoparticles in dimethyl formaldehyde and putting a drop of it on a carbon-coated copper grid. Formation of copper ferrite nanoparticles was first ascertained by electron dispersive X-ray (EDX) analysis combined with scanning electron microscope (SEM). SEM was done 'JEOL JSM-6610LV' Scanning Electron Microscope combined with EDX system (INCA Analyzer). For SEM analysis, the sample was dispersed on the aluminium stub used for sample mounting. The sample was scanned at an accelerating voltage of 20 kV at a working distance of 15mm. The particle size was measured at a magnification of 10kX.

#### **4 General procedure for the synthesis of spiropyrimidine derivatives 4 (a-o)**

To a solution of cyclic ketones (1mmol), aromatic amines (2 mmol), formaldehyde (3.3 mmol, 36% aqueous solution), and a catalytic amount of  $\text{CuFe}_2\text{O}_4$  (10 mol%) in ethanol (5 mL) was stirred at room temperature for the stipulated times. After completion of the reaction monitored by TLC, 10 mL ethanol was added to the reaction mixture and the catalyst  $\text{CuFe}_2\text{O}_4$  was separated magnetically. The reaction mixture was allowed to stand overnight. The solid material was filtered off, washed with water (2X10 mL), dried and recrystallized from ethanol to furnish pure spiropyrimidine derivatives.

#### **5 Reusability of the catalyst**

After completion of the reaction, 10 mL ethanol was added to the reaction mixture and the catalyst  $\text{CuFe}_2\text{O}_4$  was separated magnetically, washed with ethanol and then air dried. The recovered catalyst was used directly in the next runs and no substantial loss of activity was observed up to four cycles.

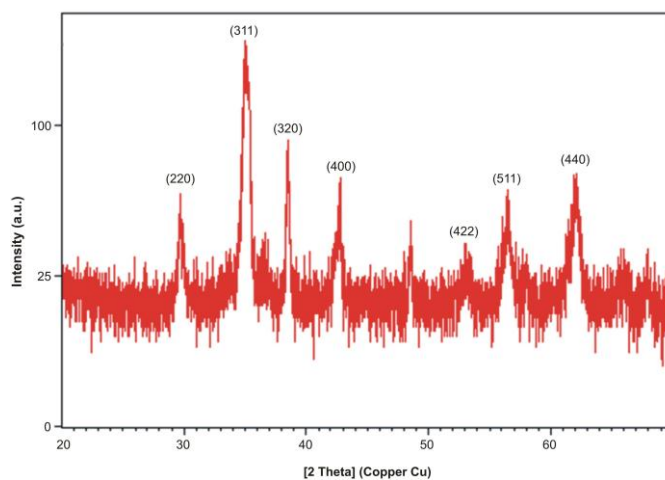

(a)

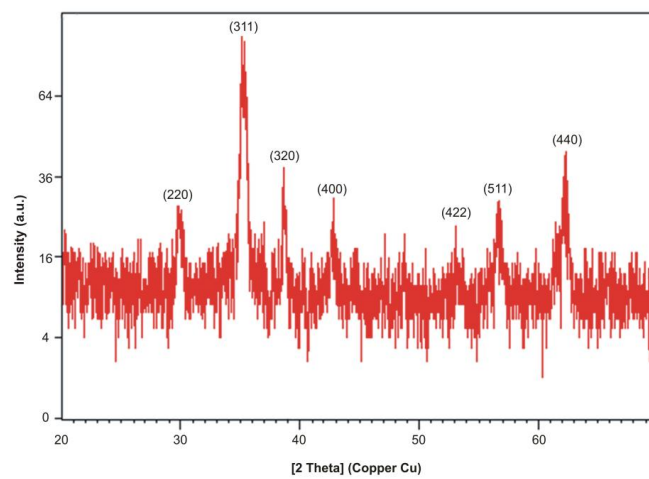

(b)

**Fig. 1.** (a) XRD spectrum of native  $\text{CuFe}_2\text{O}_4$  catalyst. (b) XRD spectrum of reused  $\text{CuFe}_2\text{O}_4$  catalyst after 4<sup>th</sup> cycle

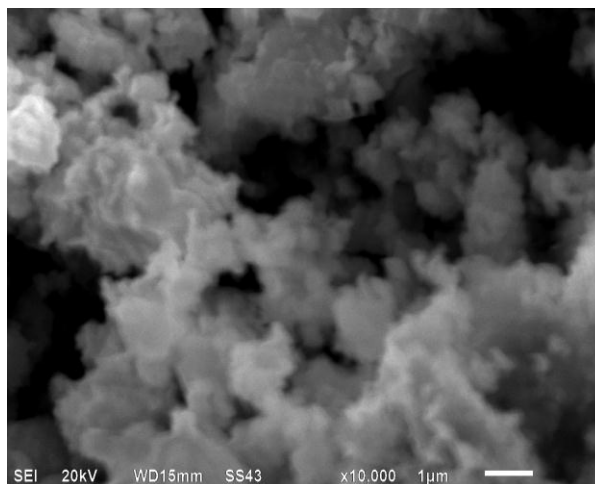

(a)

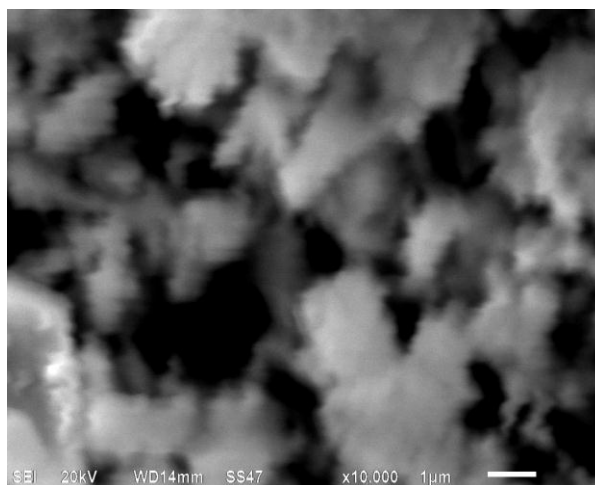

(b)

**Fig. 2.** (a) SEM image of native  $\text{CuFe}_2\text{O}_4$  catalyst. (b) SEM image of reused  $\text{CuFe}_2\text{O}_4$  catalyst after 4<sup>th</sup> cycle.

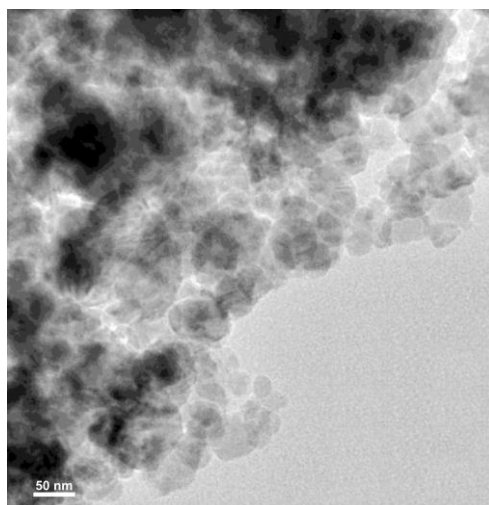

(a)

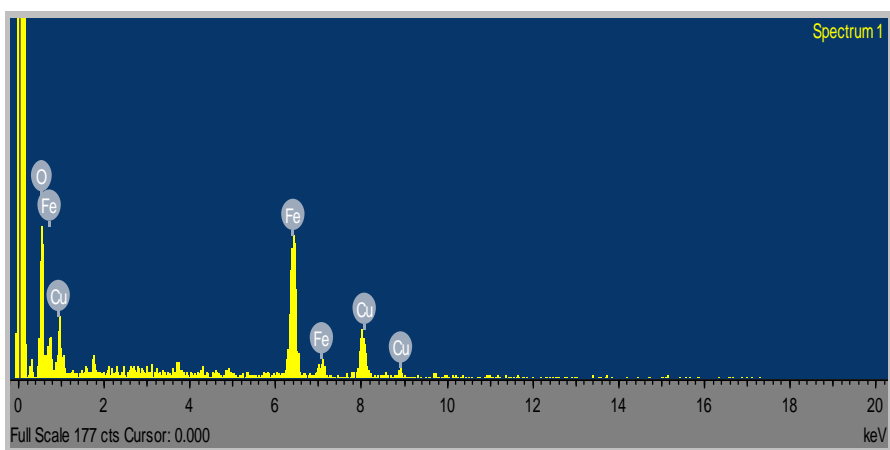

(b)

**Fig. 3.** (a) TEM image of native CuFe<sub>2</sub>O<sub>4</sub> catalyst. (b) The EDX spectrum of native CuFe<sub>2</sub>O<sub>4</sub> catalyst.

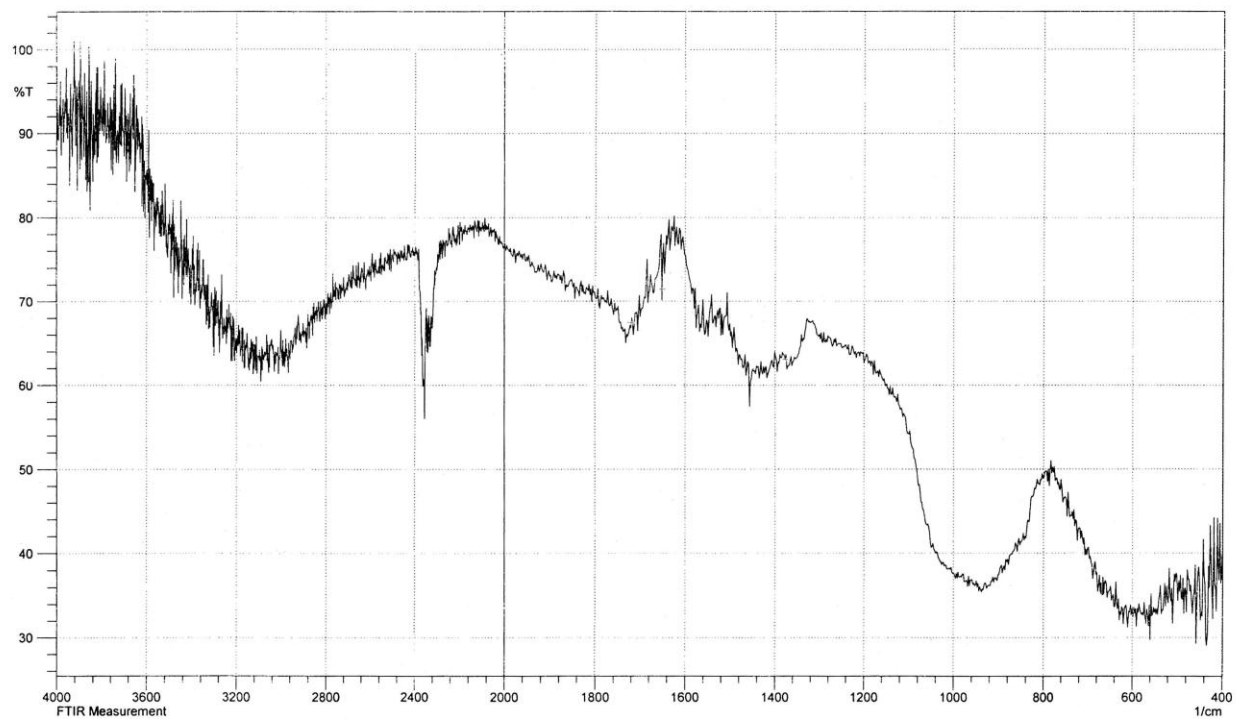

(a)

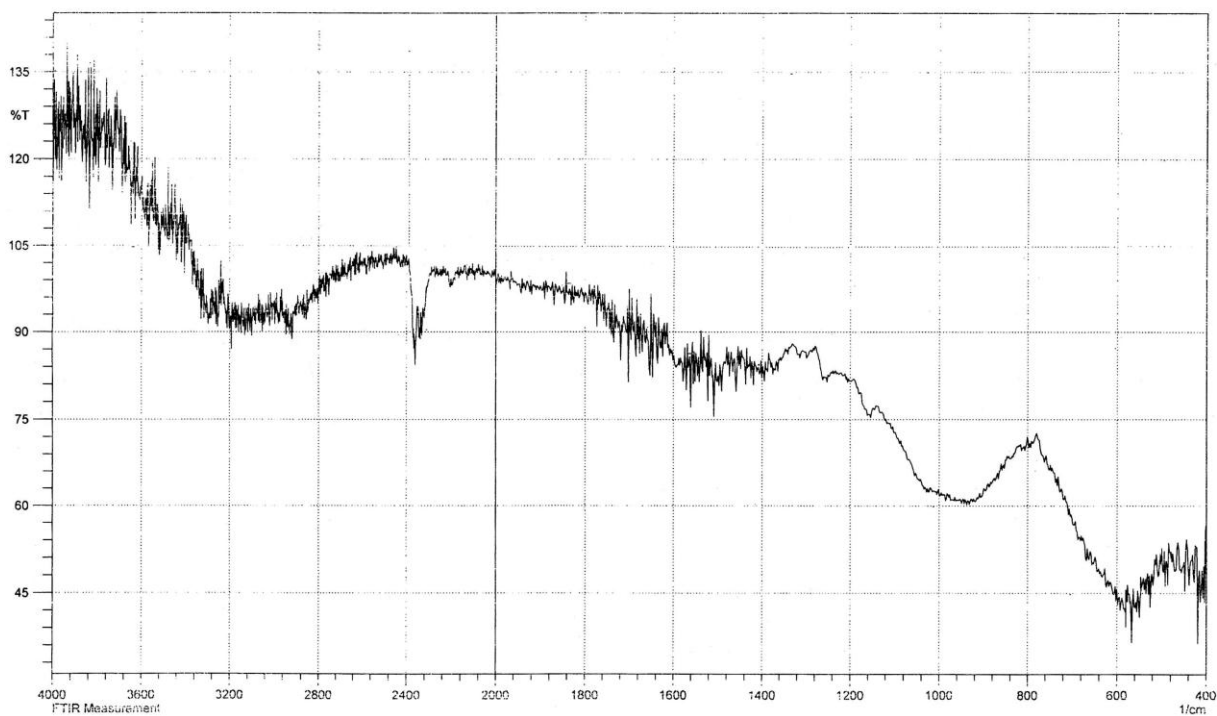

(b)

**Fig. 4.** (a) FT-IR spectrum of native  $\text{CuFe}_2\text{O}_4$  catalyst. (b) FT-IR spectrum of reused  $\text{CuFe}_2\text{O}_4$  catalyst after 4<sup>th</sup> cycle.

### Spectral data of compounds 4 (a-o)

**(4a)** 2,4-bis-(4-fluorophenyl)-2,4-diazaspiro[5.5]undecan-7-one. White Solid; (Yield: 82%); mp 122-124 °C; IR (KBr): 2944, 2785, 1712, 1576, 1486, 1233, 1208, 827 cm<sup>-1</sup>; <sup>1</sup>H NMR (300 MHz, CDCl<sub>3</sub>): δ 1.70-1.64 (m, 2H), 1.87-1.84 (m, 4H), 2.36 (t, *J* = 6.3 Hz, 2H), 3.50-3.37 (q, *J* = 12.6 Hz, 4H), 4.15 (d, *J* = 11.4 Hz, 1H), 4.61 (d, *J* = 11.1 Hz, 1H), 7.00-6.97 (m, 8H, ArH), <sup>13</sup>C NMR (75 MHz, CDCl<sub>3</sub>): 20.8, 27.8, 35.0, 39.1, 49.9, 56.2, 70.1, 115.6, 115.9, 119.2, 146.2, 156.0, 159.2, 212.8; MS (ESI) *m/z*: 356 [M]<sup>+</sup>. Anal. Calcd for C<sub>21</sub>H<sub>22</sub>F<sub>2</sub>N<sub>2</sub>O: C, 70.77; H, 6.22; N, 7.86. Found: C, 70.65; H, 6.17; N, 8.05.

**(4b)** 2,4-bis-(4-trifluoromethylphenyl)-2,4-diazaspiro[5.5]undecan-7-one. White Solid; (Yield: 73%); mp 178-180 °C; IR (KBr): 2958, 2802, 1716, 1562, 1498, 1236, 1222, 816 cm<sup>-1</sup>; <sup>1</sup>H NMR (300 MHz, CDCl<sub>3</sub>): δ 1.76-1.69 (m, 2H), 1.93-1.88 (m, 4H), 2.42 (t, *J* = 6.6 Hz, 2H), 3.63 (m, 4H), 4.19 (d, *J* = 11.1 Hz, 1H), 4.60 (d, *J* = 11.7 Hz, 1H), 7.32-6.95 (m, 8H, ArH), <sup>13</sup>C NMR (75 MHz, CDCl<sub>3</sub>): 21.2, 27.5, 34.3, 41.8, 49.5, 55.4, 69.9, 112.7, 113.2, 117.6, 145.9, 153.5, 159.8, 211.3; MS (ESI) *m/z*: 456 [M]<sup>+</sup>. Anal. Calcd for C<sub>23</sub>H<sub>22</sub>F<sub>6</sub>N<sub>2</sub>O: C, 60.52; H, 4.86; N, 6.14. Found: C, 60.58; H, 4.72; N, 6.04.

**(4c)** 2,4-bis-(4-chlorophenyl)-2,4-diazaspiro[5.5]undecan-7-one. White Solid; (Yield: 79%); mp 160-162 °C; IR (KBr): 2948, 2782, 1708, 1592, 1488, 1232, 1216, 828 cm<sup>-1</sup>; <sup>1</sup>H NMR (300 MHz, CDCl<sub>3</sub>): δ 1.71-1.67 (m, 2H), 1.90-1.86 (m, 4H), 2.37 (t, *J* = 6.3 Hz, 2H), 3.51 (l, 4H), 4.22 (d, *J* = 11.4 Hz, 1H), 4.74 (d, *J* = 11.4 Hz, 1H), 6.98 (d, *J* = 7.2 Hz, 4H), 7.24 (d, *J* = 10.2 Hz, 4H), <sup>13</sup>C NMR (75 MHz, CDCl<sub>3</sub>): 20.8, 27.6, 34.7, 39.1, 49.9, 55.2, 67.9, 118.2, 125.2, 129.1, 148.3, 212.5; MS (ESI) *m/z*: 389 [M]<sup>+</sup>. Anal. Calcd for C<sub>21</sub>H<sub>22</sub>Cl<sub>2</sub>N<sub>2</sub>O: C, 64.79; H, 5.70; N, 7.20. Found: C, 64.88; H, 5.77; N, 7.08.

**(4d)** 2,4-di-p-tolyl-2,4-diazaspiro[5.5]undecan-7-one. White Solid; (Yield: 74%); mp 124-126 °C; IR (KBr): 2932, 1708, 1546, 1460, 1234, 1210, 816 cm<sup>-1</sup>; <sup>1</sup>H NMR (300 MHz, CDCl<sub>3</sub>): δ 1.68-1.66 (m, 2H), 1.88-1.86 (m, 4H), 2.29 (s, 6H), 2.39 (t, *J* = 6.0 Hz, 2H), 3.40 (d, *J* = 12.3 Hz, 2H), 3.52 (d, *J* = 12.6 Hz, 2H), 4.10 (d, *J* = 11.4 Hz, 1H), 4.79 (d, *J* = 11.1 Hz, 1H), 6.96 (d, *J* = 8.1 Hz, 4H), 7.10 (d, *J* = 8.1 Hz, 4H), <sup>13</sup>C NMR (75 MHz, CDCl<sub>3</sub>): 20.4, 20.8, 27.7, 29.6, 34.6, 39.1, 50.0, 55.4, 69.4, 117.4, 129.7, 147.8, 213.3; MS (ESI) *m/z*: 348 [M]<sup>+</sup>. Anal. Calcd for C<sub>23</sub>H<sub>28</sub>N<sub>2</sub>O: C, 79.27; H, 8.10; N, 8.04. Found: C, 79.41; H, 8.21; N, 7.95.

**(4e)** 2,4-bis-(3-chloro-4-fluorophenyl)-2,4-diazaspiro[5.5]undecan-7-one. White Solid; (Yield: 75%); mp 248-250 °C; IR (KBr): 2948, 2782, 1708, 1592, 1488, 1232, 1216, 828 cm<sup>-1</sup>; <sup>1</sup>H NMR (300 MHz, CDCl<sub>3</sub>): δ 1.72-1.69 (m, 2H), 1.99-1.81 (m, 4H), 2.46 (t, *J* = 6.9 Hz, 2H), 3.35 (d, *J* = 12.6 Hz, 2H), 3.59 (d, *J* = 12.6 Hz, 2H), 4.28 (d, *J* = 11.4 Hz, 1H), 4.71 (d, *J* = 11.4 Hz, 1H), 6.87 (d, *J* = 8.4 Hz, 2H), 6.92 (s, 2H), 7.24 (d, *J* = 8.7 Hz, 2H), <sup>13</sup>C NMR (75 MHz, CDCl<sub>3</sub>): 20.3, 27.9, 34.8, 39.2, 50.8, 55.4, 69.3, 114.4, 119.9, 129.2, 131.6, 135.5, 148.7, 213.3; MS (ESI) *m/z*: 425 [M]<sup>+</sup>. Anal. Calcd for C<sub>21</sub>H<sub>20</sub>Cl<sub>2</sub>F<sub>2</sub>N<sub>2</sub>O: C, 59.31; H, 4.74; N, 6.59. Found: C, 59.19; H, 4.82; N, 6.69.



**(4f)** 2,4-bis-(4-fluorophenyl)-10-methyl-2,4-diazaspiro[5.5]undecan-7-one. White Solid, (Yield: 76%); mp 130-132 °C; IR (KBr): 2978, 2922, 2863, 1712, 1609, 1498, 1474, 1256, 1126, 1026, 912, 806, 744 cm<sup>-1</sup>; <sup>1</sup>H NMR (300 MHz, CDCl<sub>3</sub>): δ 0.83 (d, *J* = 6.0 Hz, 3H), 1.06 (t, *J* = 12.6 Hz, 1H), 1.41-1.31 (m, 1H), 2.00 (br s, 2H), 2.37-2.22 (m, 2H), 2.57-2.45 (m, 1H), 3.03 (d, *J* = 12.3 Hz, 1H), 3.30 (d, *J* = 12.6 Hz, 1H), 3.61 (d, *J* = 12.6 Hz, 1H), 3.75 (d, *J* = 12.6 Hz, 1H), 4.14 (d, *J* = 11.4 Hz, 1H), 4.62 (d, *J* = 11.1 Hz, 1H), 7.00-6.98 (m, 8H), <sup>13</sup>C NMR (75 MHz, CDCl<sub>3</sub>): 21.2, 27.3, 35.7, 38.6, 43.1, 49.3, 56.0, 57.1, 70.2, 115.6, 115.9, 118.9, 119.0, 119.6, 146.2, 156.1, 159.1, 213.0; MS (ESI) *m/z*: 370 [M]<sup>+</sup>. Anal. Calcd for C<sub>22</sub>H<sub>24</sub>F<sub>2</sub>N<sub>2</sub>O: C, 71.33; H, 6.53; N, 7.56. Found: C, 71.60; H, 6.58; N, 7.35.

**(4g)** 2,4-bis-(4-trifluoromethylphenyl)-10-methyl-2,4-diazaspiro[5.5]undecan-7-one. White Solid, (Yield: 70%); mp 204-206 °C; IR (KBr): 2972, 2934, 2855, 1710, 1617, 1532, 1463, 1222, 1138, 1018, 922, 806, 738 cm<sup>-1</sup>; <sup>1</sup>H NMR (300 MHz, CDCl<sub>3</sub>): δ 0.92 (d, *J* = 6.6 Hz, 3H), 1.05 (t, *J* = 12.0 Hz, 1H), 1.63-1.58 (m, 1H), 2.13-2.01 (m, 2H), 2.58-2.52 (m, 3H), 3.24 (d, *J* = 12.3 Hz, 1H), 3.48 (d, *J* = 12.9 Hz, 1H), 3.68 (d, *J* = 11.7 Hz, 1H), 3.82 (d, *J* = 12.3 Hz, 1H), 4.21 (d, *J* = 11.7 Hz, 1H), 4.69 (d, *J* = 11.7 Hz, 1H), 7.11 (d, *J* = 8.1 Hz, 4H), 7.29 (d, *J* = 8.4 Hz, 4H), <sup>13</sup>C NMR (75 MHz, CDCl<sub>3</sub>): 21.8, 27.1, 37.7, 39.4, 42.1, 50.5, 55.9, 57.6, 69.4, 115.3, 118.1, 123.5, 127.1, 130.2, 135.6, 142.4, 150.9, 212.5; MS (ESI) *m/z*: 470 [M]<sup>+</sup>. Anal. Calcd for C<sub>24</sub>H<sub>24</sub>F<sub>6</sub>N<sub>2</sub>O: C, 61.27; H, 5.14; N, 5.95. Found: C, 61.50; H, 5.18; N, 5.78.

**(4h)** 2,4-bis-(4-chlorophenyl)-10-methyl-2,4-diazaspiro[5.5]undecan-7-one. White Solid, (Yield: 75%); mp 166-168 °C; IR (KBr): 2960, 2928, 2860, 1704, 1618, 1502, 1462, 1240, 1126, 1014, 910, 814, 736 cm<sup>-1</sup>; <sup>1</sup>H NMR (300 MHz, CDCl<sub>3</sub>): δ 0.85 (d, *J* = 6.3 Hz, 3H), 1.09 (t, *J* = 12.6 Hz, 1H), 2.04-1.98 (m, 3H), 2.35-2.28 (m, 2H), 2.51-2.49 (m, 1H), 3.14 (d, *J* = 12.9 Hz, 1H), 3.39 (d, *J* = 12.6 Hz, 1H), 3.71 (d, *J* = 12.6 Hz, 1H), 3.84 (d, *J* = 12.9 Hz, 1H), 4.25 (d, *J* = 11.4 Hz, 1H), 4.75 (d, *J* = 11.7 Hz, 1H), 7.06-6.98 (m, 4H), 7.27-7.23 (m, 4H), <sup>13</sup>C NMR (75 MHz, CDCl<sub>3</sub>): 21.2, 27.4, 35.6, 38.6, 42.9, 49.4, 55.0, 56.1, 68.1, 118.0, 118.6, 125.0, 125.6, 129.1, 129.2, 148.3, 212.6; MS (ESI) *m/z*: 403 [M]<sup>+</sup>. Anal. Calcd for C<sub>22</sub>H<sub>24</sub>Cl<sub>2</sub>N<sub>2</sub>O: C, 65.51; H, 6.00; N, 6.95. Found: C, 65.42; H, 6.07; N, 6.82.

**(4i)** 10-Methyl-2,4-di-p-tolyl-2,4-diazaspiro[5.5]undecan-7-one. White Solid, (Yield: 72%); mp 104-106 °C; IR (KBr): 2962, 2926, 1710, 1614, 1520, 1456, 1388, 1224, 1136, 918, 816, 732, 524 cm<sup>-1</sup>; <sup>1</sup>H NMR (300 MHz, CDCl<sub>3</sub>): δ 0.79 (d, *J* = 5.6 Hz, 3H), 1.03 (t, *J* = 12.8 Hz, 1H), 1.42-1.25 (m, 1H), 1.99-1.94 (m, 2H), 2.28-2.22 (l, 7H), 2.42-2.38 (m, 1H), 2.60-2.49 (m, 1H), 3.16 (d, *J* = 12.6 Hz, 1H), 3.21 (d, *J* = 12.6 Hz, 1H), 3.56 (d, *J* = 12.6 Hz, 1H), 3.82 (d, *J* = 12.6 Hz, 1H), 4.10 (d, *J* = 11.4 Hz, 1H), 4.78 (d, *J* = 11.4 Hz, 1H), 6.88-6.83 (m, 4H), 7.11 (d, *J* = 9.2 Hz, 4H), <sup>13</sup>C NMR (75 MHz, CDCl<sub>3</sub>): 20.5, 21.0, 27.3, 35.4, 37.1, 43.1, 49.8, 55.0, 56.9, 70.3, 116.7, 117.6, 129.5, 130.3, 147.9, 212.8; MS (ESI) *m/z*: 362 [M]<sup>+</sup>. Anal. Calcd for C<sub>24</sub>H<sub>30</sub>N<sub>2</sub>O: C, 79.52; H, 8.34; N, 7.73. Found: C, 79.63; H, 8.26; N, 7.62.

**(4j)** 2,4-bis-(3-chloro-4-fluorophenyl)-10-methyl-2,4-diazaspiro[5.5]undecan-7-one. White Solid, (Yield: 64%); mp 236-238 °C; IR (KBr): 2960, 2928, 2860, 1704, 1618,

1502, 1462, 1240, 1126, 1014, 910, 814, 736  $\text{cm}^{-1}$ ;  $^1\text{H}$  NMR (300 MHz,  $\text{CDCl}_3$ ):  $\delta$  0.91 (d,  $J = 6.9$  Hz, 3H), 1.03 (t,  $J = 12.6$  Hz, 1H), 1.68-1.61 (m, 1H), 2.04-1.98 (m, 2H), 2.51-2.45 (m, 3H), 3.29 (d,  $J = 12.3$  Hz, 2H), 3.54 (d,  $J = 12.3$  Hz, 1H), 3.83 (d,  $J = 12.3$  Hz, 1H), 4.21 (d,  $J = 11.1$  Hz, 1H), 4.73 (d,  $J = 11.1$  Hz, 1H), 6.81-6.74 (m, 2H), 6.91 (s, 2H), 7.19 (d,  $J = 8.4$  Hz, 2H),  $^{13}\text{C}$  NMR (75 MHz,  $\text{CDCl}_3$ ): 21.9, 27.8, 36.2, 39.7, 42.9, 50.3, 55.1, 56.8, 67.4, 115.3, 118.8, 120.5, 124.1, 130.5, 136.7, 151.3, 212.6; MS (ESI)  $m/z$ : 439  $[\text{M}]^+$ . Anal. Calcd for  $\text{C}_{22}\text{H}_{22}\text{Cl}_2\text{F}_2\text{N}_2\text{O}$ : C, 60.15; H, 5.05; N, 6.38. Found: C, 60.03; H, 5.14; N, 6.27.

**(4k)**2,4-bis(4-fluorophenyl)-10-(1,1-dioxa-2,2-dimethylene)-2,4-diazaspiro[5.5]undecan-7-one. White solid, (Yield: 58%); mp 130-132  $^\circ\text{C}$ ; IR (KBr): 2988, 1704, 1528, 1445, 1256, 1047, 932, 830, 718  $\text{cm}^{-1}$ ;  $^1\text{H}$  NMR (300 MHz,  $\text{CDCl}_3$ ):  $\delta$  2.02 (t,  $J = 6.9$  Hz, 2H), 2.14 (s, 2H), 2.57 (t,  $J = 6.6$  Hz, 2H), 3.30 (d,  $J = 12.3$  Hz, 2H), 3.92-3.66 (m, 6H), 4.00 (d,  $J = 10.8$  Hz, 1H), 4.72 (d,  $J = 11.1$  Hz, 1H), 6.99-6.97 (m, 8H),  $^{13}\text{C}$  NMR (75 MHz,  $\text{CDCl}_3$ ): 35.0, 36.3, 40.5, 48.7, 57.0, 64.4, 69.8, 107.1, 115.5, 115.8, 119.2, 146.4, 155.9, 159.1, 211.4; MS (ESI)  $m/z$ : 414  $[\text{M}]^+$ . Anal. Calcd for  $\text{C}_{23}\text{H}_{24}\text{F}_2\text{N}_2\text{O}_3$ : C, 66.65; H, 5.84; N, 6.76. Found: C, 66.82; H, 5.77; N, 6.48.

**(4l)**2,4-bis(4-trifluoromethylphenyl)-10-(1,1-dioxa-2,2-dimethylene)-2,4-diazaspiro[5.5]undecan-7-one. White solid, (Yield: 54%); mp 144-146  $^\circ\text{C}$ ; IR (KBr): 2954, 1708, 1512, 1456, 1244, 1042, 918, 826, 726  $\text{cm}^{-1}$ ;  $^1\text{H}$  NMR (300 MHz,  $\text{CDCl}_3$ ):  $\delta$  2.13-2.01 (m, 4H), 2.43-2.37 (m, 1H), 2.97-2.65 (m, 4H), 3.22-3.16 (m, 1H) 3.44-3.37 (m, 2H), 4.05-4.02 (m, 4H), 6.57 (d,  $J = 8.7$  Hz, 4H), 7.37 (d,  $J = 8.7$  Hz, 4H),  $^{13}\text{C}$  NMR (75 MHz,  $\text{CDCl}_3$ ): 34.4, 38.3, 38.7, 43.0, 46.0, 48.9, 64.7, 64.8, 107.0, 111.9, 126.6, 150.2, 211.5; MS (ESI)  $m/z$ : 514  $[\text{M}]^+$ . Anal. Calcd for  $\text{C}_{25}\text{H}_{24}\text{F}_6\text{N}_2\text{O}_3$ : C, 58.37; H, 4.70; N, 5.45. Found: C, 58.48; H, 4.47; N, 5.52.

**(4m)**2,4-bis(4-chlorophenyl)-10-(1,1-dioxa-2,2-dimethylene)-2,4-diazaspiro[5.5]undecan-7-one. White solid, (Yield: 61%); mp 132-134  $^\circ\text{C}$ ; IR (KBr): 2954, 1708, 1512, 1456, 1244, 1042, 918, 826, 726  $\text{cm}^{-1}$ ;  $^1\text{H}$  NMR (300 MHz,  $\text{CDCl}_3$ ):  $\delta$  2.02 (t,  $J = 6.9$  Hz, 2H), 2.11 (s, 2H), 2.58 (t,  $J = 6.9$  Hz, 2H), 3.37 (d,  $J = 12.6$  Hz, 2H), 3.85-3.74 (m, 4H), 3.93-3.88 (m, 2H), 4.08 (d,  $J = 11.1$  Hz, 1H), 4.84 (d,  $J = 11.4$  Hz, 1H), 6.98 (d,  $J = 9.0$  Hz, 4H), 7.23 (d,  $J = 9.0$  Hz, 4H),  $^{13}\text{C}$  NMR (75 MHz,  $\text{CDCl}_3$ ): 34.9, 36.3, 40.4, 48.7, 56.0, 64.4, 67.7, 106.9, 118.3, 125.2, 129.1, 148.4, 211.2; MS (ESI)  $m/z$ : 447  $[\text{M}]^+$ . Anal. Calcd for  $\text{C}_{23}\text{H}_{24}\text{Cl}_2\text{N}_2\text{O}_3$ : C, 61.75; H, 5.41; N, 6.26. Found: C, 61.84; H, 5.47; N, 6.18.

**(4n)**10-(1,1-dioxa-2,2-dimethylene)-2,4-di-p-tolyl-2,4-diazaspiro[5.5]undecan-7-one. White Solid, (Yield: 52%); mp 126-128  $^\circ\text{C}$ ; IR (KBr): 2928, 1710, 1522, 1108, 914, 734, 652  $\text{cm}^{-1}$ ;  $^1\text{H}$  NMR (300 MHz,  $\text{CDCl}_3$ ):  $\delta$  2.02 (t,  $J = 7.6$  Hz, 2H), 2.16 (s, 2H), 2.27 (s, 6H), 2.62 (t,  $J = 6.6$  Hz, 2H), 3.24 (d,  $J = 12.8$  Hz, 2H), 3.79-3.72 (l, 4H), 3.88-3.82 (m, 2H), 3.93 (d,  $J = 11.1$  Hz, 1H), 4.92 (d,  $J = 10.8$  Hz, 1H), 6.98 (d,  $J = 8.6$  Hz, 4H), 7.08 (d,  $J = 8.6$  Hz, 4H),  $^{13}\text{C}$  NMR (75 MHz,  $\text{CDCl}_3$ ): 20.7, 35.3, 36.4, 40.1, 49.6, 56.4, 64.3, 69.7, 107.2, 117.4, 129.3, 149.7, 212.4; MS (ESI)  $m/z$ : 406  $[\text{M}]^+$ . Anal. Calcd for  $\text{C}_{25}\text{H}_{30}\text{N}_2\text{O}_3$ : C, 73.86; H, 7.44; N, 6.89. Found: C, 73.75; H, 7.54; N, 6.74.

**(4o)**2,4-bis(3-chloro-4-fluorophenyl)-10-(1,1-dioxo-2,2-dimethylene)-2,4-diazaspiro[5.5]undecan-7-one. White solid, (Yield: 55%); mp 206-208 °C; IR (KBr): 2954, 1708, 1512, 1456, 1244, 1042, 918, 826, 726 cm<sup>-1</sup>; <sup>1</sup>H NMR (300 MHz, CDCl<sub>3</sub>): δ 2.09 (t, *J* = 7.5 Hz, 2H), 2.23 (s, 2H), 2.64 (t, *J* = 6.9 Hz, 2H), 3.38 (d, *J* = 12.3 Hz, 2H), 3.84-3.72 (m, 4H), 3.92-3.88 (m, 2H), 4.21 (d, *J* = 11.7 Hz, 1H), 4.85 (d, *J* = 11.7 Hz, 1H), 6.91 (s, 2H), 6.99 (d, *J* = 9.0 Hz, 2H), 7.29 (d, *J* = 9.0 Hz, 2H), <sup>13</sup>C NMR (75 MHz, CDCl<sub>3</sub>): 24.6, 30.1, 37.1, 45.7, 54.1, 62.9, 64.8, 105.9, 118.2, 122.5, 128.1, 134.5, 138.5, 148.3, 211.3; MS (ESI) *m/z*: 483 [M]<sup>+</sup>. Anal. Calcd for C<sub>23</sub>H<sub>22</sub>Cl<sub>2</sub>F<sub>2</sub>N<sub>2</sub>O<sub>3</sub>: C, 57.15; H, 4.59; N, 5.80. Found: C, 57.26; H, 4.70; N, 5.63.

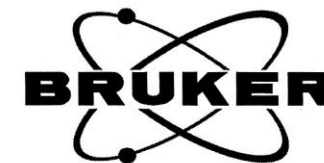

Current Data Parameters  
NAME proton  
EXPNO 200  
PROCNO 1

F2 - Acquisition Parameters

Date\_ 20120814  
Time 13.58  
INSTRUM spect  
PROBHD 5 mm BBO BB-1H  
PULPROG zg30  
TD 32768  
SOLVENT CDCl3  
NS 26  
DS 0  
SWH 4807.692 Hz  
FIDRES 0.146719 Hz  
AQ 3.4079220 sec  
RG 80.6  
DW 104.000 usec  
DE 6.00 usec  
TE 291.8 K  
D1 1.00000000 sec  
TD0 1

===== CHANNEL f1 =====  
NUC1 1H  
P1 11.00 usec  
PL1 0.00 dB  
SFO1 300.1320008 MHz

F2 - Processing parameters  
SI 16384  
SF 300.1300022 MHz  
WDW EM  
SSB 0  
LB 0.00 Hz  
GB 0  
PC 1.00

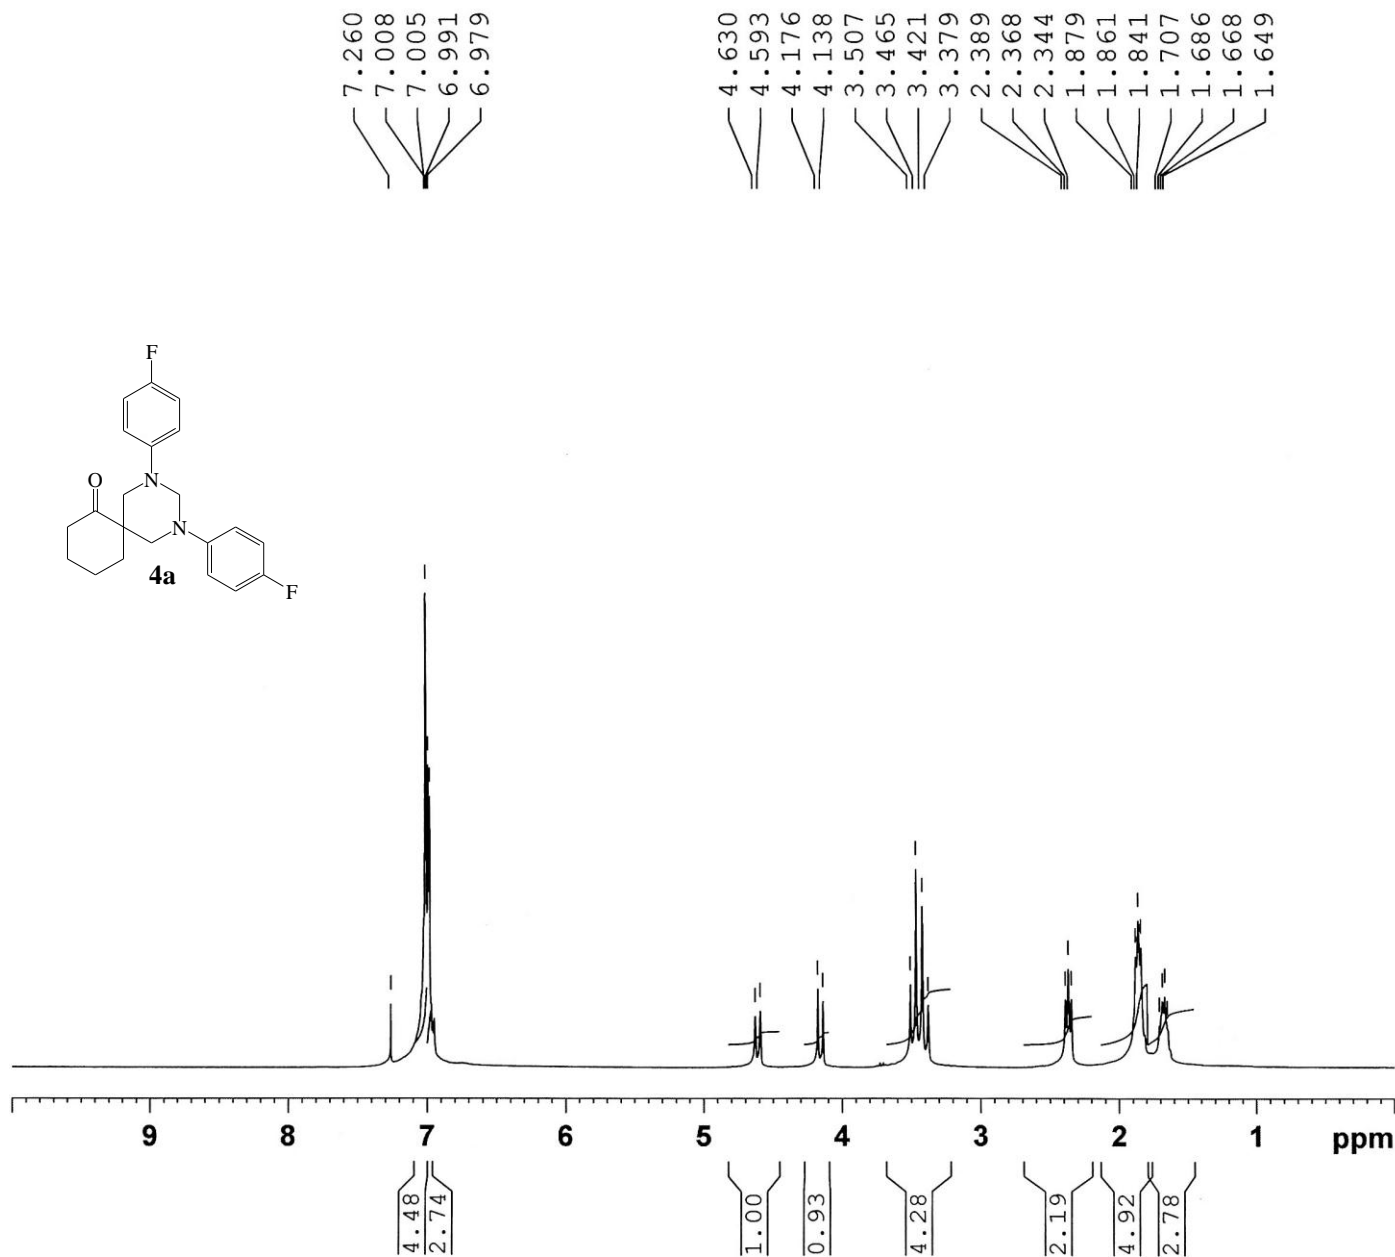

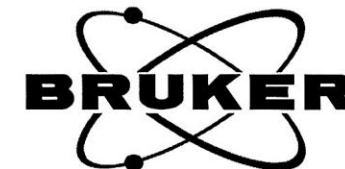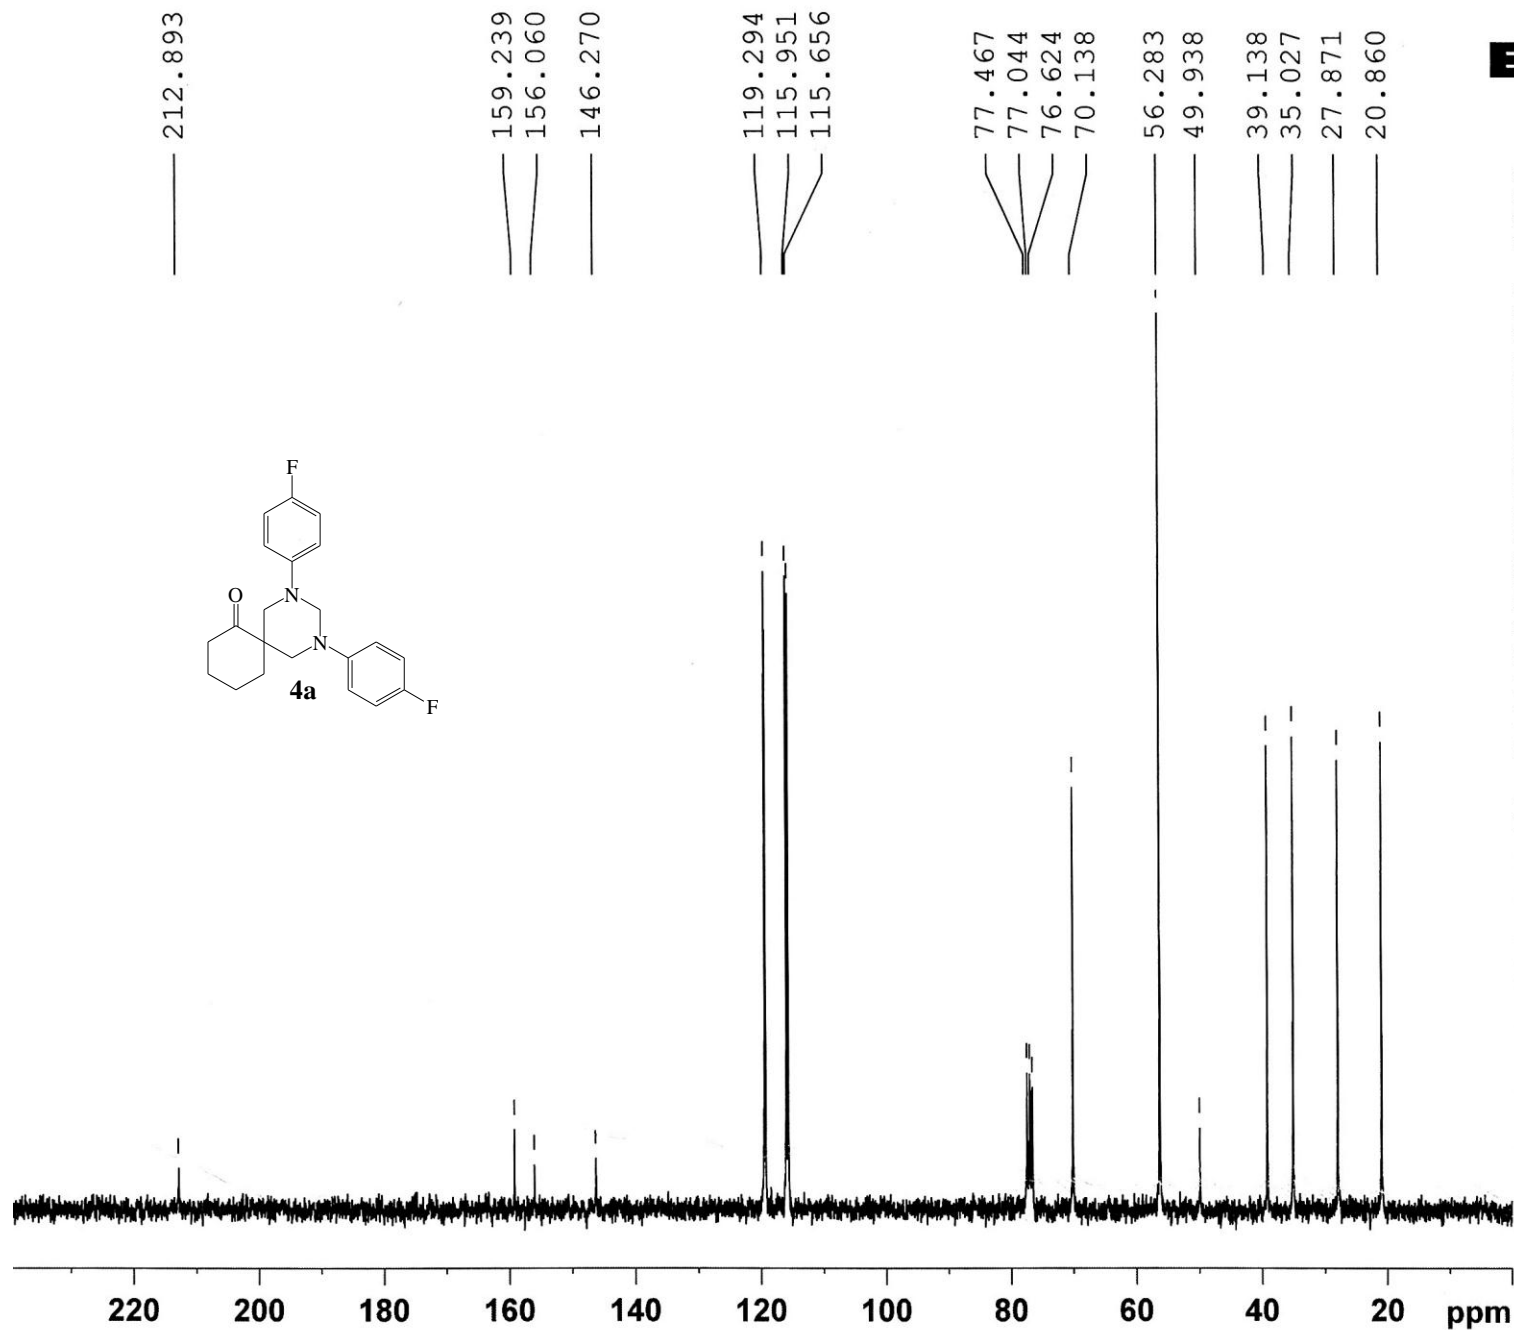

Current Data Parameters  
NAME carbon  
EXPNO 8  
PROCNO 1

F2 - Acquisition Parameters  
Date\_ 20120814  
Time\_ 14.08  
INSTRUM spect  
PROBHD 5 mm BBO BB-1H  
PULPROG zgpg  
TD 32768  
SOLVENT CDCl3  
NS 488  
DS 4  
SWH 19531.250 Hz  
FIDRES 0.596046 Hz  
AQ 0.8389108 sec  
RG 71.8  
DW 25.600 usec  
DE 6.00 usec  
TE 292.4 K  
D1 1.00000000 sec  
d11 0.03000000 sec  
DELTA 0.89999998 sec  
TDO 1

===== CHANNEL f1 =====  
NUC1 13C  
P1 9.20 usec  
PL1 -1.00 dB  
SFO1 75.4772005 MHz

===== CHANNEL f2 =====  
CPDPRG2 waltz16  
NUC2 1H  
PCPD2 80.00 usec  
PL12 17.20 dB  
PL13 20.20 dB  
PL2 0.00 dB  
SFO2 300.1315007 MHz

F2 - Processing parameters  
SI 131072  
SF 75.4677490 MHz  
WDW EM  
SSB 0  
LB 2.00 Hz  
GB 0  
PC 1.40

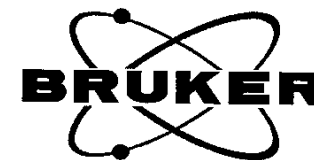

Current Data Parameters  
NAME prasadH  
EXPNO 1939  
PROCNO 1

F2 - Acquisition Parameters  
Date\_ 20110808  
Time\_ 15.04  
INSTRUM spect  
PROBHD 5 mm BBO BB-1H  
PULPROG zg30  
TD 32768  
SOLVENT CDCl3  
NS 32  
DS 0  
SWH 4807.692 Hz  
FIDRES 0.146719 Hz  
AQ 3.4079220 sec  
RG 406  
DW 104.000 usec  
DE 6.00 usec  
TE 292.6 K  
D1 1.00000000 sec  
TD0 1

==== CHANNEL f1 =====  
NUC1 1H  
P1 11.00 usec  
PL1 0.00 dB  
SF01 300.132008 MHz

F2 - Processing parameters  
SI 16384  
SF 300.130040 MHz  
WDW EM  
SSB 0  
LB 0.50 Hz  
GB 0  
PC 1.00

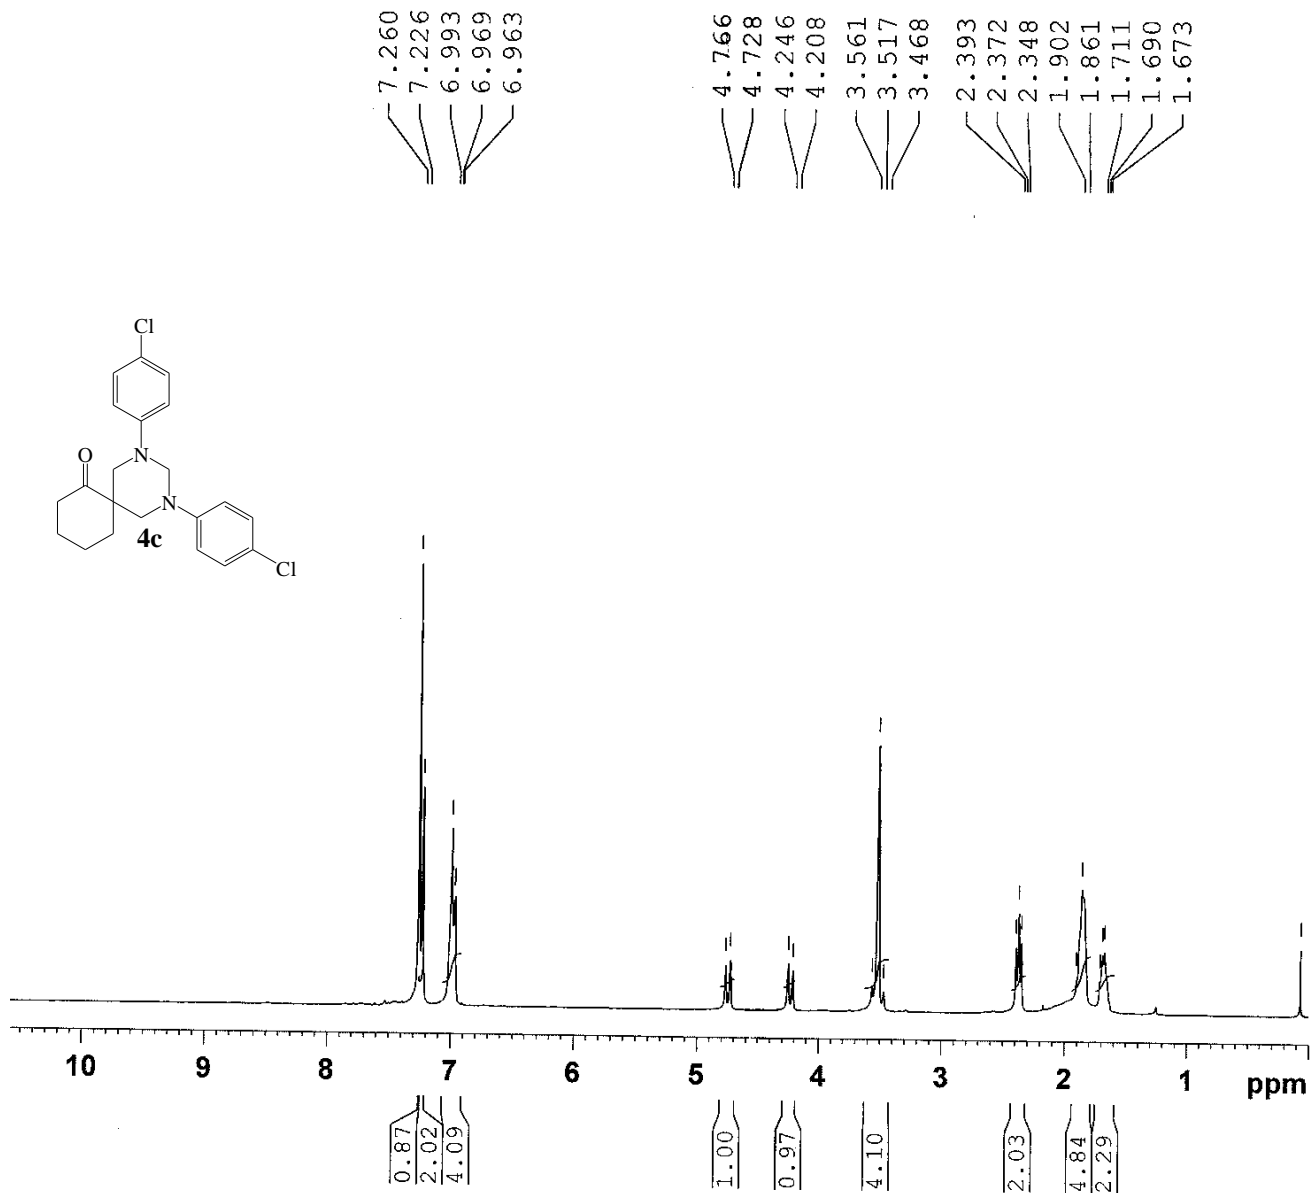

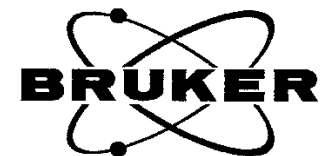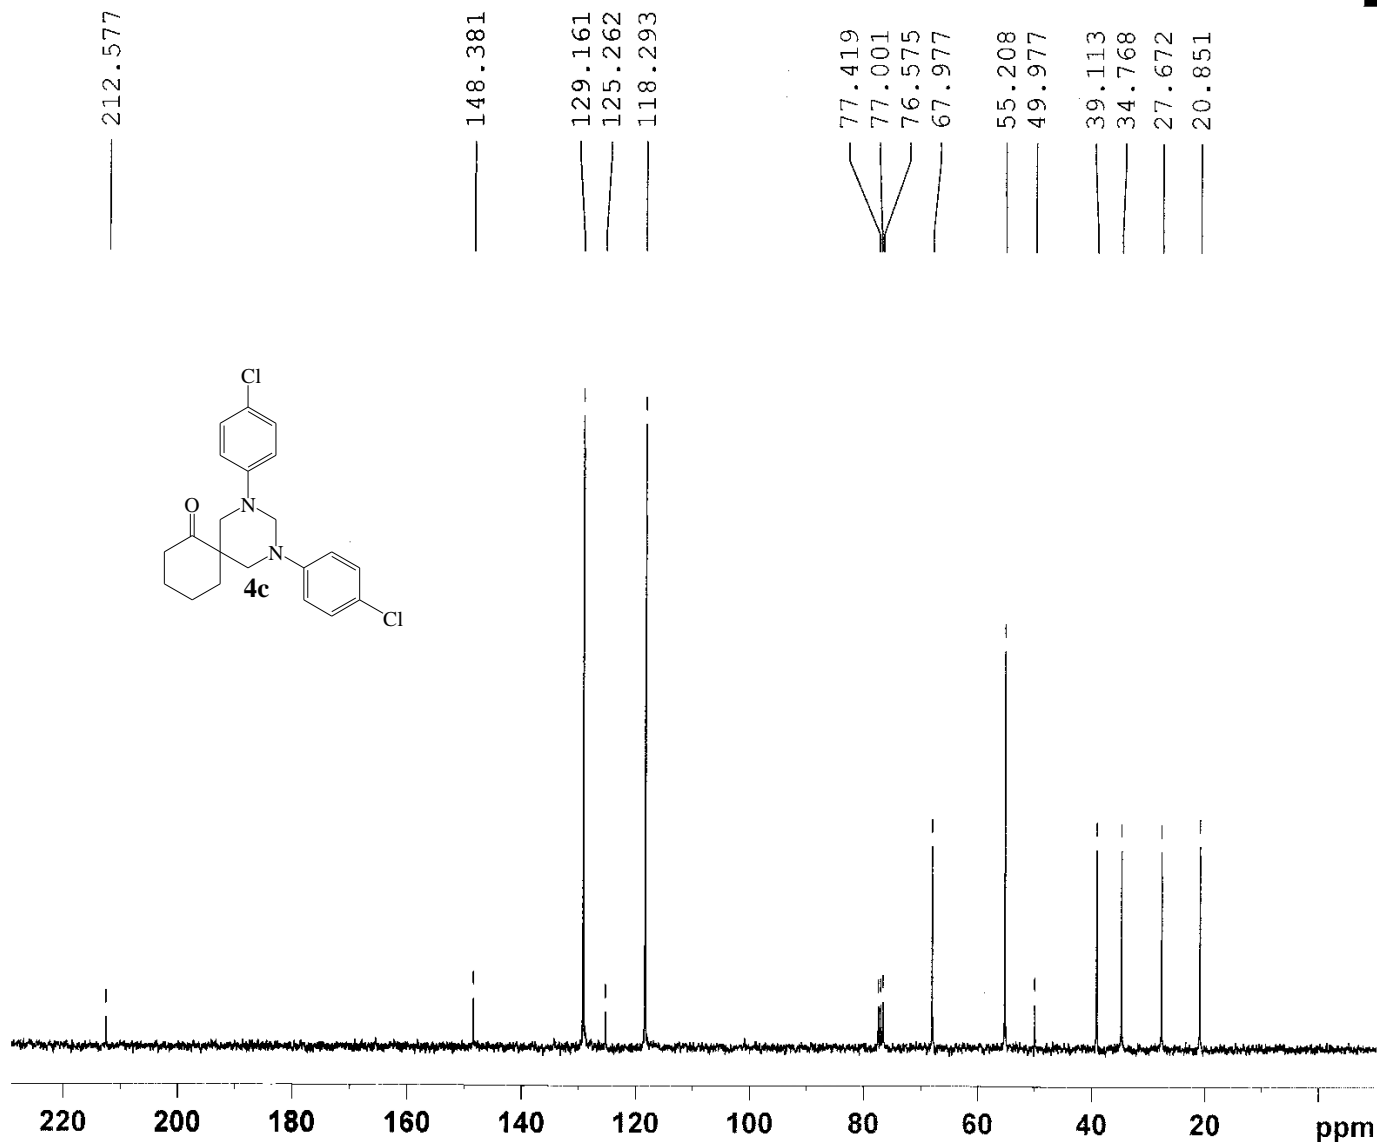

Current Data Parameters  
NAME prasad C  
EXPNO 462  
PROCNO 1

F2 - Acquisition Parameters  
Date 20110923  
Time 11.10  
INSTRUM spect  
PROBHD 5 mm BBO BB-1H  
PULPROG zgpg  
TD 32768  
SOLVENT CDC13  
NS 201  
DS 4  
SWH 18115.941 Hz  
FIDRES 0.552855 Hz  
AQ 0.9044468 sec  
RG 144  
DW 27.600 usec  
DE 6.00 usec  
TE 292.3 K  
D1 1.00000000 sec  
d11 0.03000000 sec  
DELTA 0.89999998 sec  
TD0 1

==== CHANNEL f1 =====  
NUC1 13C  
P1 9.20 usec  
PL1 -1.00 dB  
SFO1 75.4760505 MHz

==== CHANNEL f2 =====  
CPDPRG2 waltz16  
NUC2 1H  
PCPD2 80.00 usec  
PL12 17.20 dB  
PL13 20.20 dB  
PL2 0.00 dB  
SFO2 300.1315007 MHz

F2 - Processing parameters  
SI 131072  
SF 75.4677554 MHz  
WDW EM  
SSB 0  
LB 3.00 Hz  
GB 0  
PC 1.40

MSAIF, CDRI LUCKNOW

Original Data Path: 11SEP6161.RAW  
Current Data Path: C:\Data2011\SEP11\  
Sample ID: AVJ-82 #6411  
Acquisition Date: 9/6/2011 2:17:40 PM  
Vial: B:21  
11SEP6161 #60-146 RT: 0.79-1.80 AV: 87 SB: 1 0.00 NL: 1.57E6  
T: + c ESI Full ms [ 50.00-500.00]

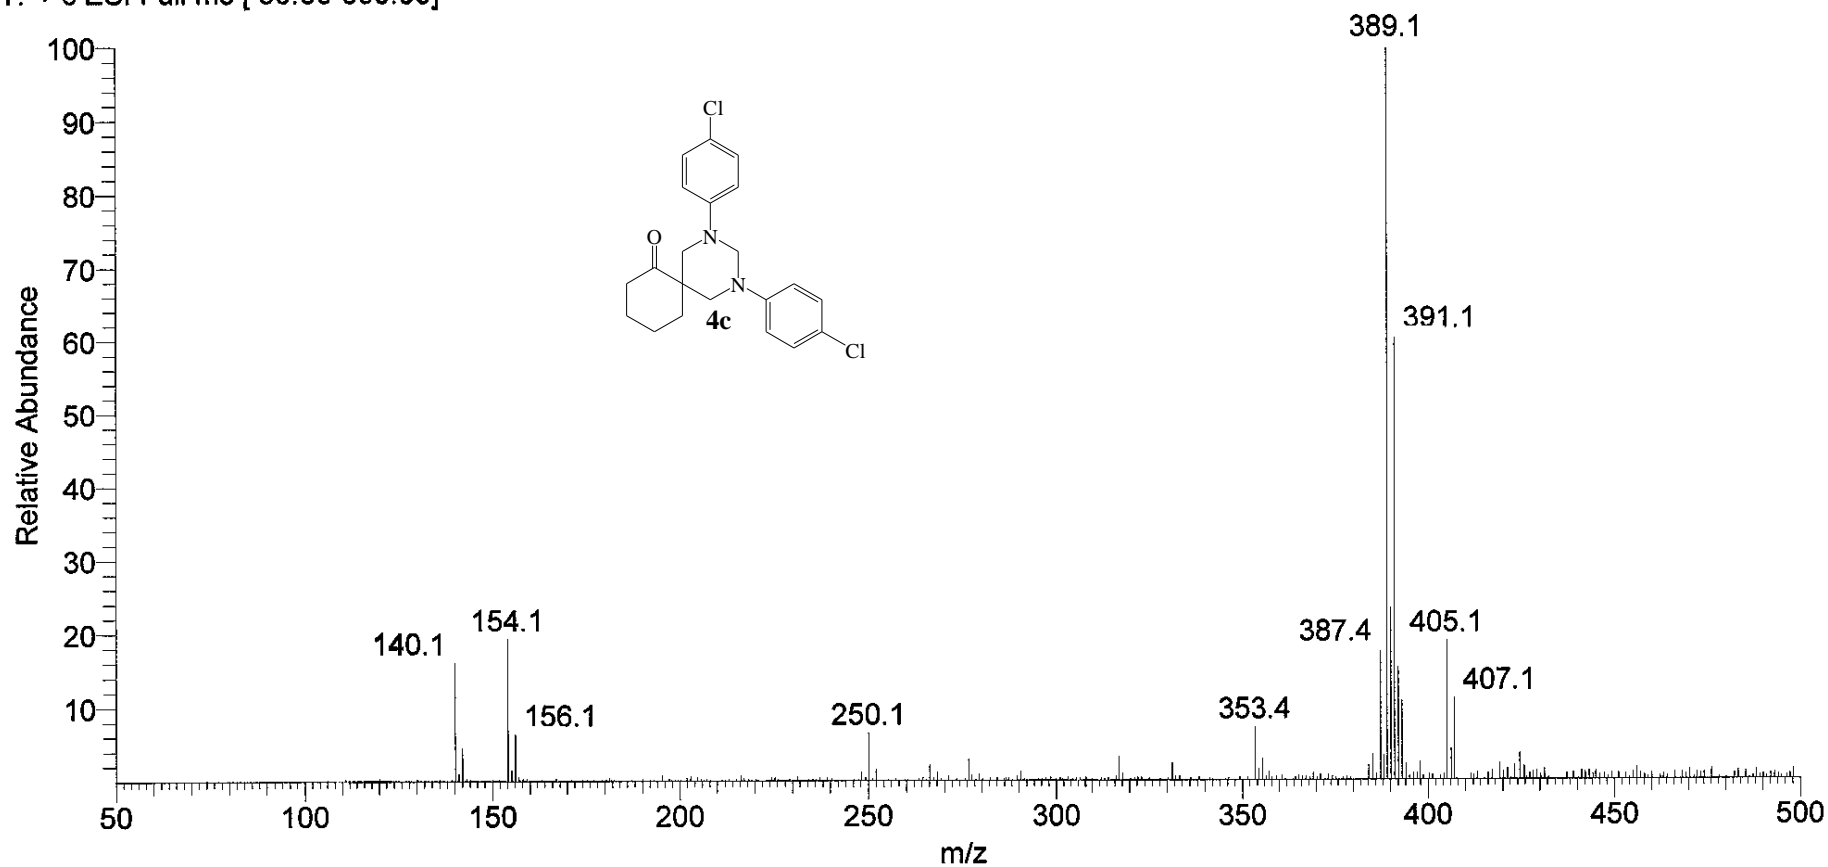



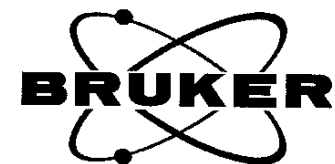

Current Data Parameters  
NAME prasadH  
EXPNO 1519  
PROCNO 1

F2 - Acquisition Parameters  
Date\_ 20101116  
Time 11.02  
INSTRUM spect  
PROBHD 5 mm BBO BB-1H  
PULPROG zg30  
TD 32768  
SOLVENT CDCl3  
NS 32  
DS 0  
SWH 4807.692 Hz  
FIDRES 0.146719 Hz  
AQ 3.4079220 sec  
RG 64  
DW 104.000 usec  
DE 6.00 usec  
TE 291.9 K  
D1 1.00000000 sec  
TD0 1

===== CHANNEL f1 =====  
NUC1 1H  
P1 11.00 usec  
PL1 0.00 dB  
SFO1 300.1320008 MHz

F2 - Processing parameters  
SI 16384  
SF 300.1300045 MHz  
WDW EM  
SSB 0  
LB 0.50 Hz  
GB 0  
PC 1.00

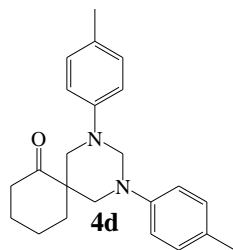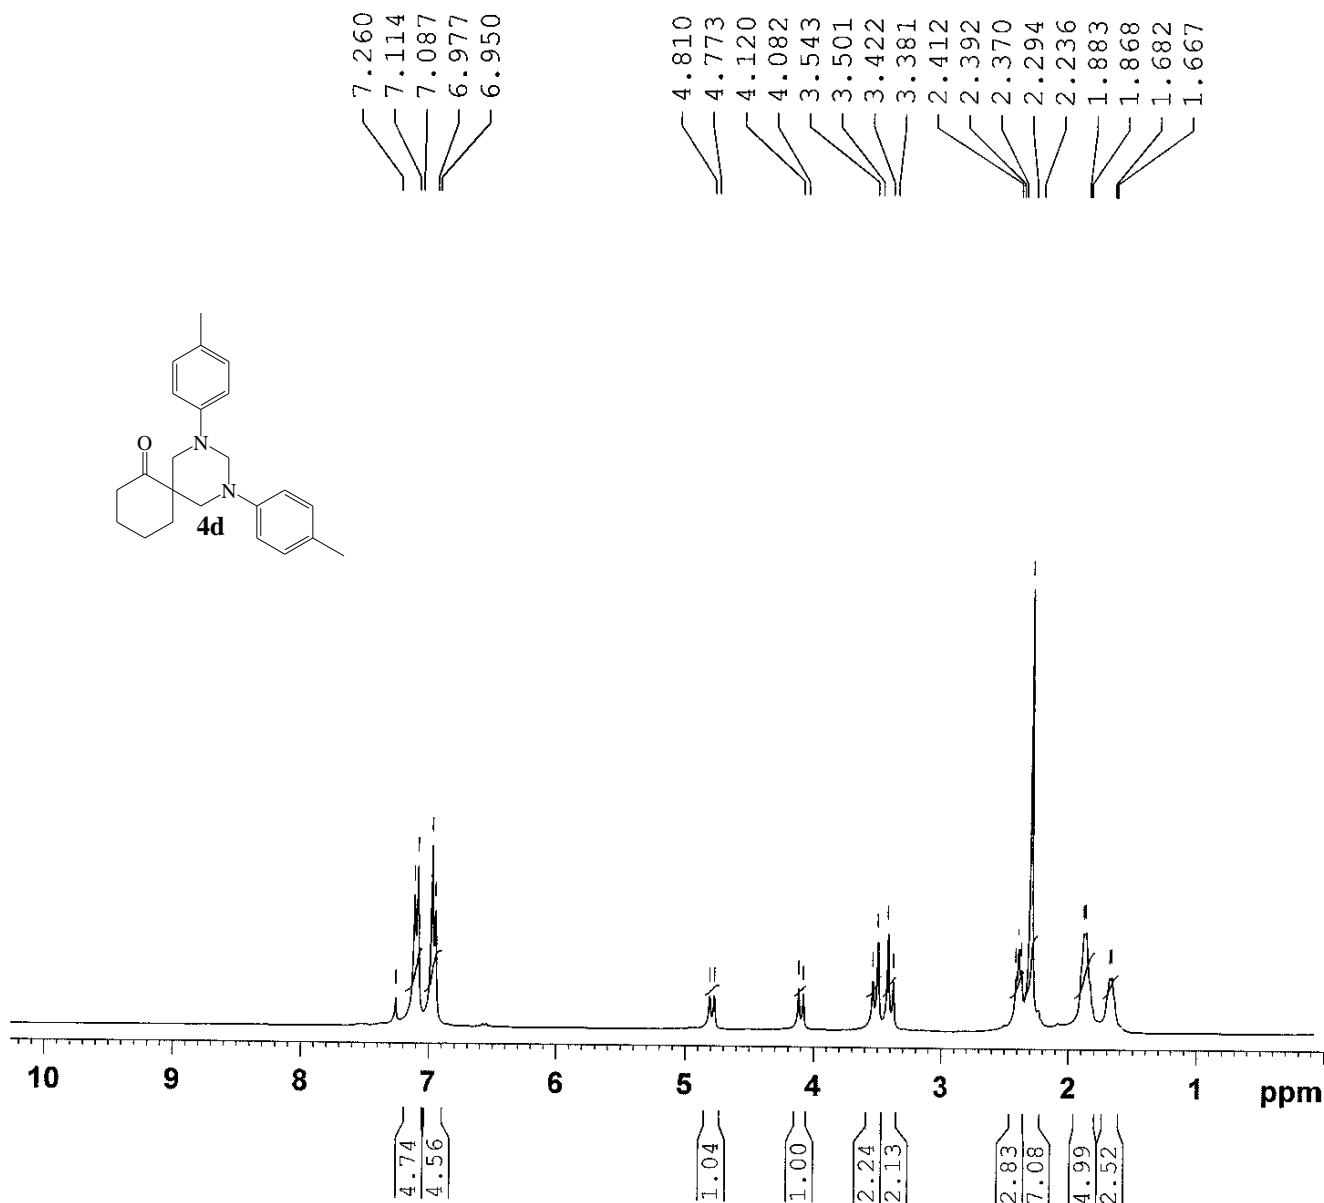

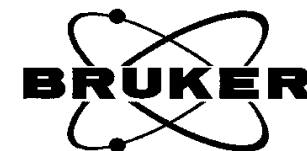

Current Data Parameters  
NAME prasad C  
EXPNO 372  
PROCNO 1

F2 - Acquisition Parameters

Date\_ 20101116  
Time\_ 11.05  
INSTRUM spect  
PROBHD 5 mm BBO BB-1H  
PULPROG zgpg  
TD 32768  
SOLVENT CDCl3  
NS 261  
DS 4  
SWH 18115.941 Hz  
FIDRES 0.552855 Hz  
AQ 0.9044468 sec  
RG 80.6  
DW 27.600 usec  
DE 6.00 usec  
TE 292.1 K  
D1 1.00000000 sec  
d11 0.03000000 sec  
DELTA 0.89999998 sec  
TDO 1

=====  
CHANNEL f1  
NUC1 13C  
P1 9.20 usec  
PL1 -1.00 dB  
SFO1 75.4740505 MHz

=====  
CHANNEL f2  
CPDPRG2 waltz16  
NUC2 1H  
PCPD2 80.00 usec  
PLI2 17.20 dB  
PLI3 20.20 dB  
PL2 0.00 dB  
SFO2 300.1315007 MHz

F2 - Processing parameters  
SI 131072  
SF 75.4677548 MHz  
WDW EM  
SSB 0  
LB 3.00 Hz  
GB 0  
PC 1.40

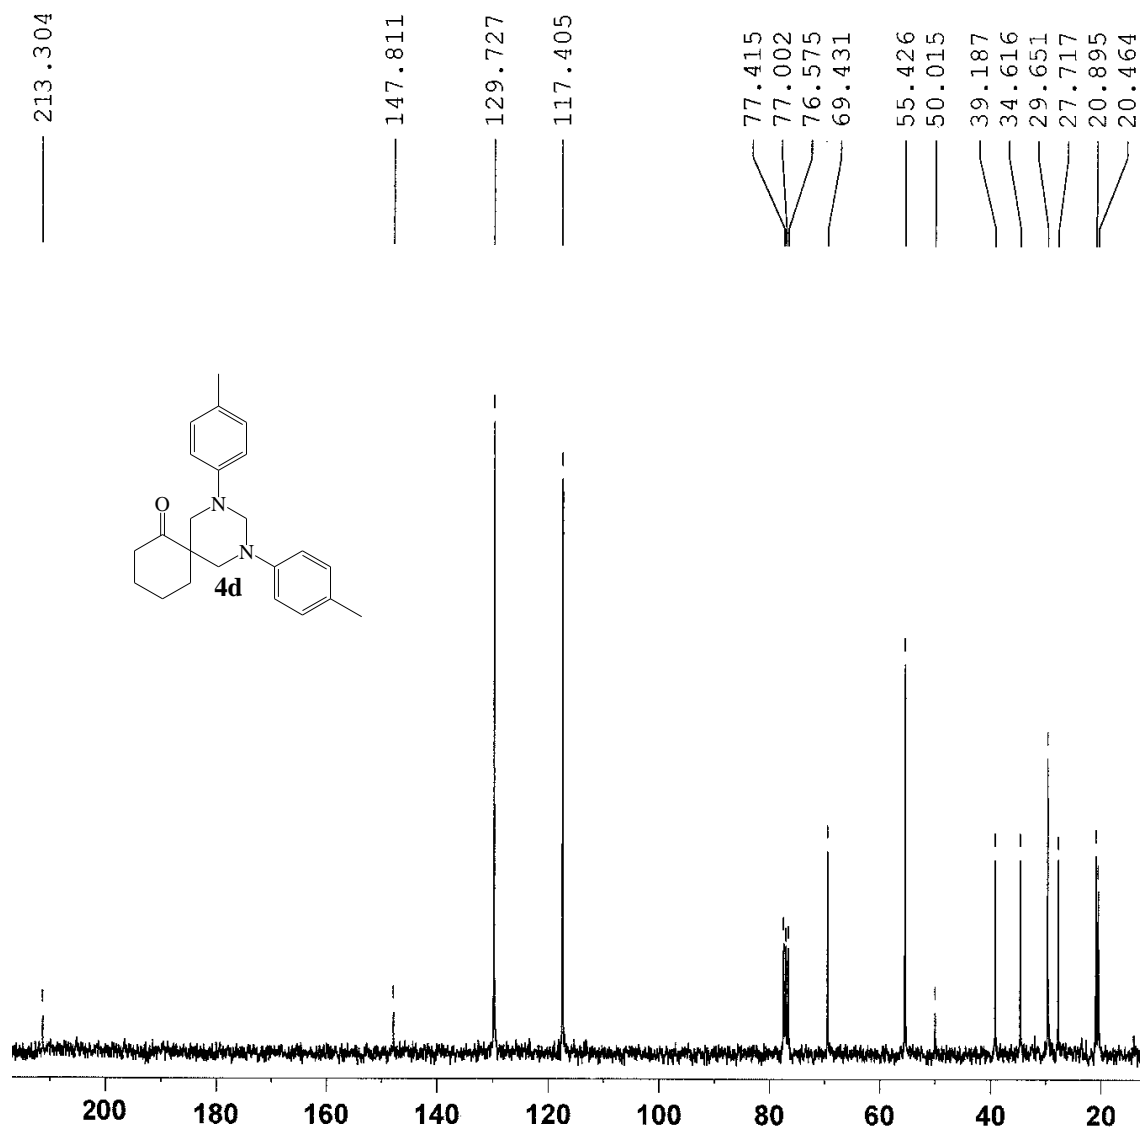

MSAIF, CDRI LUCKNOW

Original Data Path: 10E15NOV15111150151\_114809.RAW  
Current Data Path: C:\GAP0032\TCW03A\NOV10\  
Sample ID: AVJ-62 #5694  
Acquisition Date: 11/15/2010 2:28:14 PM  
Vial: B:19  
10E15NOV15111150151\_114809 #11-64 RT: 0.10-0.60 AV: 54 SB: 1 0.00 NL: 1.10E8  
T: + c ESI Full ms [ 50.00-500.00]

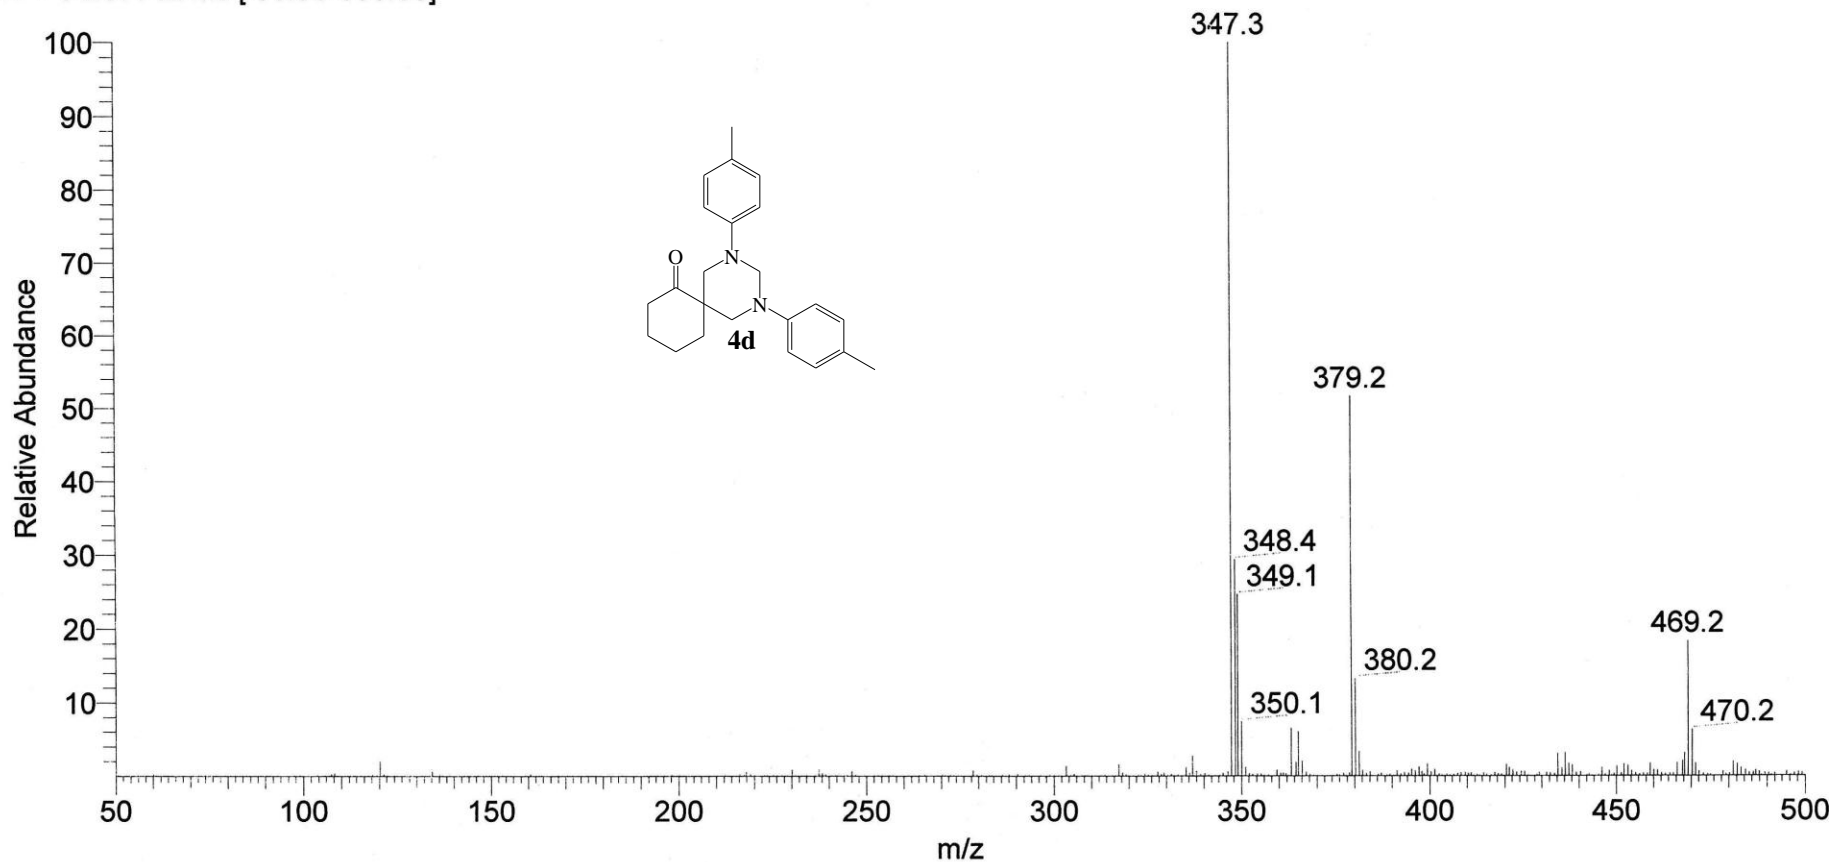

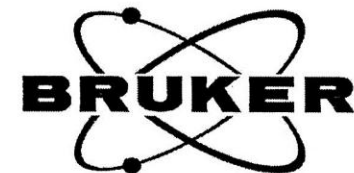

Current Data Parameters  
NAME prasad C  
EXPNO 466  
PROCNO 1

F2 - Acquisition Parameters

Date 20110923  
Time 12.33  
INSTRUM spect  
PROBHD 5 mm BBO BB-1H  
PULPROG zgpg  
TD 32768  
SOLVENT CDCl3  
NS 97  
DS 4  
SWH 18115.941 Hz  
FIDRES 0.552855 Hz  
AQ 0.9044468 sec  
RG 144  
DW 27.600 usec  
DE 6.00 usec  
TE 293.1 K  
D1 1.00000000 sec  
d11 0.03000000 sec  
DELTA 0.89999998 sec  
TDO 1

==== CHANNEL f1 =====  
NUC1 13C  
P1 9.20 usec  
PL1 -1.00 dB  
SFO1 75.4760505 MHz

==== CHANNEL f2 =====  
CPDPRG2 waltz16  
NUC2 1H  
PCPD2 80.00 usec  
PL12 17.20 dB  
PL13 20.20 dB  
PL2 0.00 dB  
SFO2 300.1315007 MHz

F2 - Processing parameters  
SI 131072  
SF 75.4677534 MHz  
WDW EM  
SSB 0  
LB 3.00 Hz  
GB 0  
PC 1.40

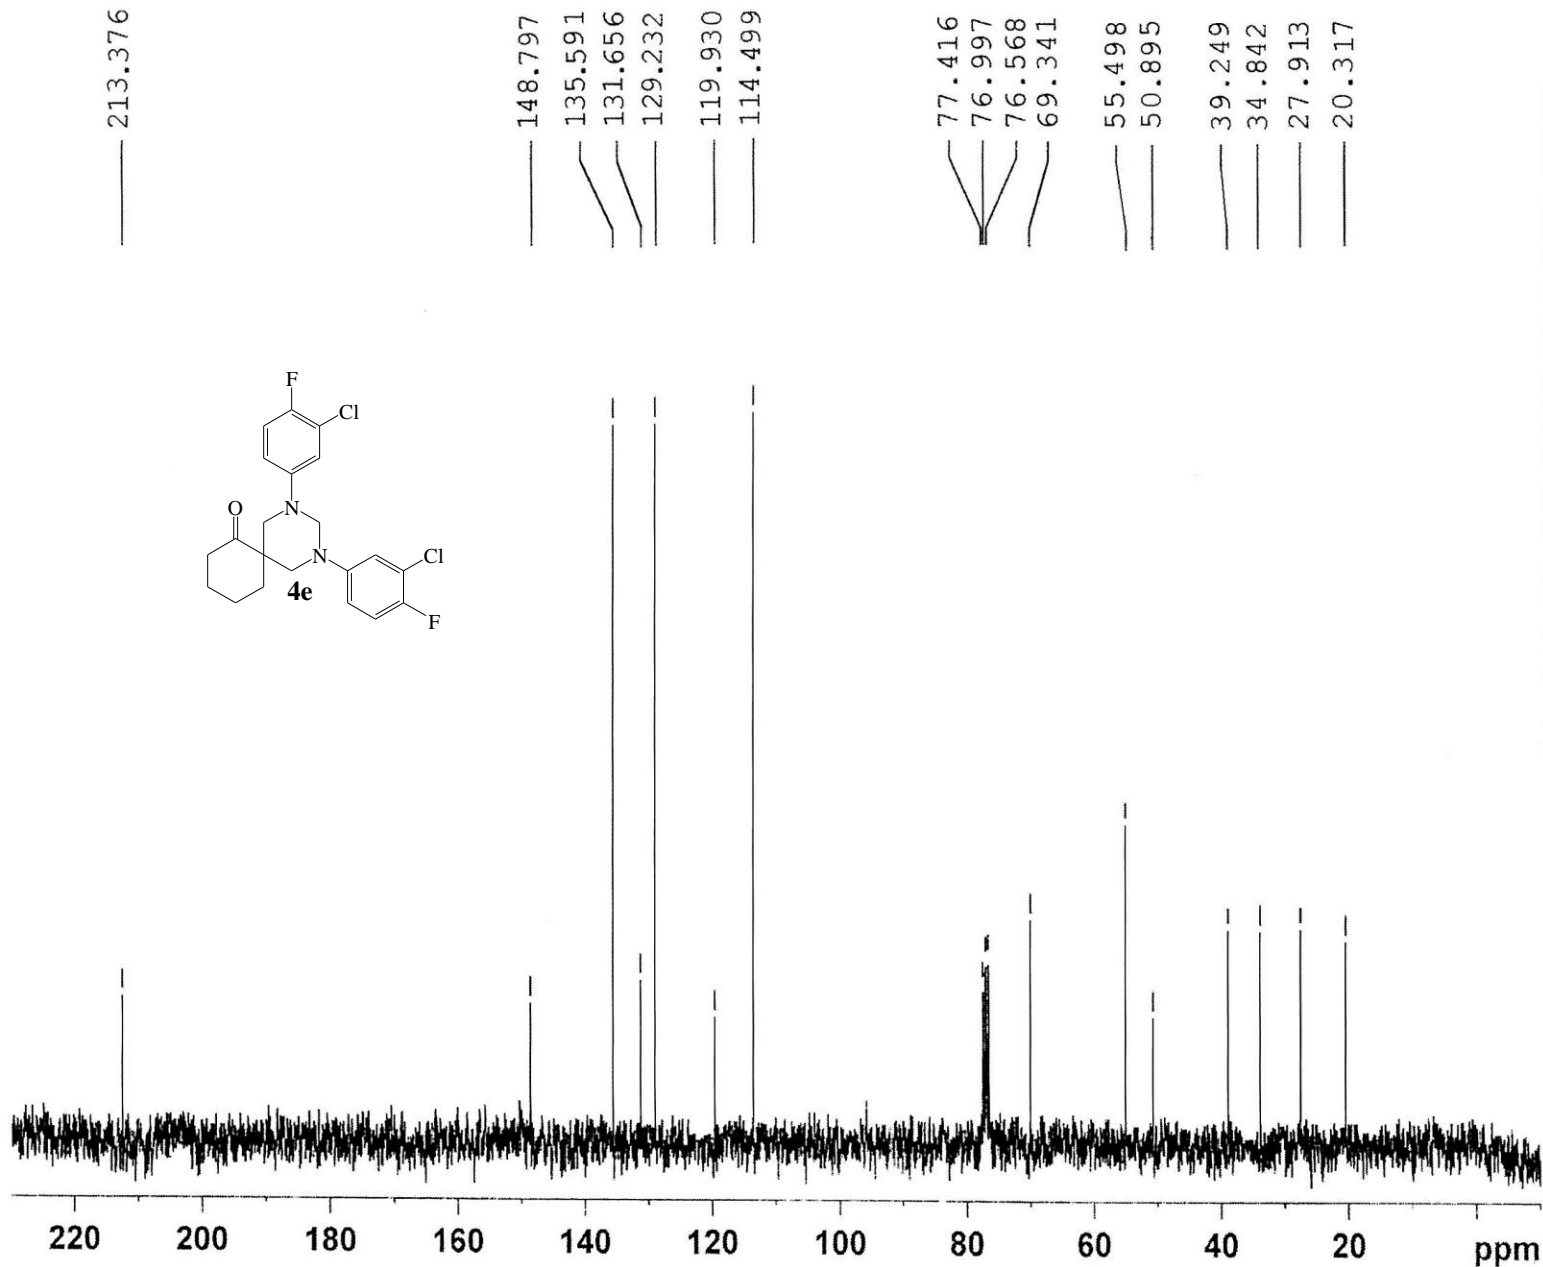

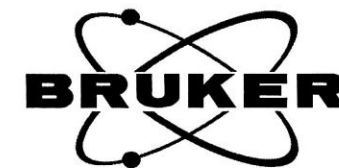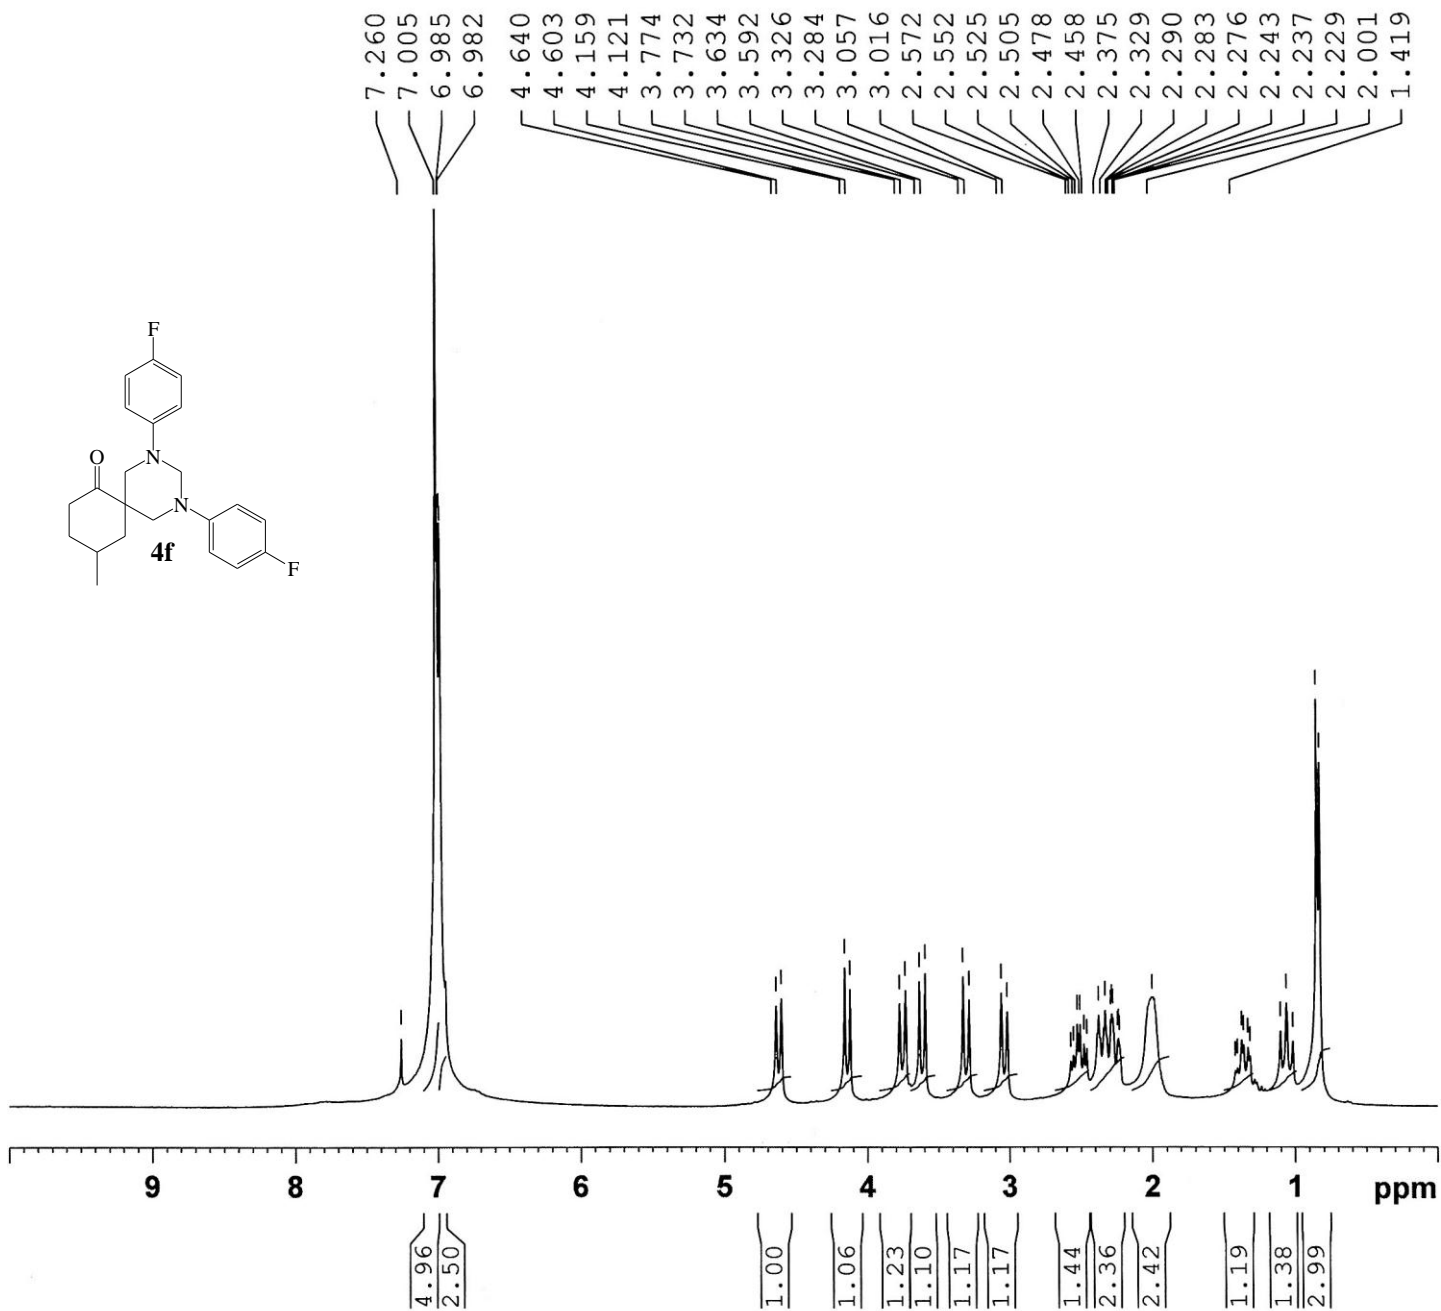

Current Data Parameters  
NAME proton  
EXPNO 201  
PROCNO 1

F2 - Acquisition Parameters  
Date\_ 20120814  
Time\_ 14.21  
INSTRUM spect  
PROBHD 5 mm BBO BB-1H  
PULPROG zg30  
TD 32768  
SOLVENT CDCl3  
NS 28  
DS 0  
SWH 4807.692 Hz  
FIDRES 0.146719 Hz  
AQ 3.4079220 sec  
RG 80.6  
DW 104.000 usec  
DE 6.00 usec  
TE 292.0 K  
D1 1.00000000 sec  
TD0 1

==== CHANNEL f1 =====  
NUC1 1H  
P1 11.00 usec  
PL1 0.00 dB  
SFO1 300.1320008 MHz

F2 - Processing parameters  
SI 16384  
SF 300.1300021 MHz  
WDW EM  
SSB 0  
LB 0.00 Hz  
GB 0  
PC 1.00

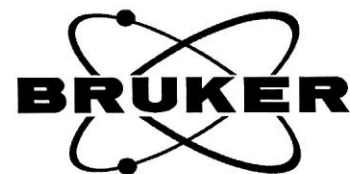

4.640  
4.603  
4.159  
4.121  
3.774  
3.732  
3.634  
3.592  
3.326  
3.284  
3.057  
3.016  
2.572  
2.552  
2.525  
2.505  
2.478  
2.458  
2.375  
2.329  
2.290  
2.283  
2.276  
2.243  
2.237  
2.229  
2.001  
1.419  
1.404  
1.374  
1.361  
1.330  
1.316  
1.103  
1.061  
1.017  
0.844  
0.824

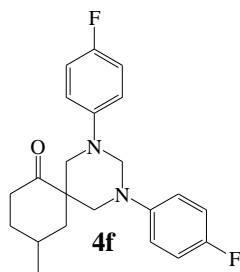

Current Data Parameters  
NAME proton  
EXPNO 201  
PROCNO 1

F2 - Acquisition Parameters  
Date\_ 20120814  
Time\_ 14.21  
INSTRUM spect  
PROBHD 5 mm BBO BB-1H  
PULPROG zg30  
TD 32768  
SOLVENT CDCl3  
NS 28  
DS 0  
SWH 4807.692 Hz  
FIDRES 0.146719 Hz  
AQ 3.4079220 sec  
RG 80.6  
DW 104.000 usec  
DE 6.00 usec  
TE 292.0 K  
D1 1.00000000 sec  
TD0 1

===== CHANNEL f1 =====  
NUC1 1H  
P1 11.00 usec  
PL1 0.00 dB  
SFO1 300.1320008 MHz

F2 - Processing parameters  
SI 16384  
SF 300.1300021 MHz  
WDW EM  
SSB 0  
LB 0.00 Hz  
GB 0  
PC 1.00

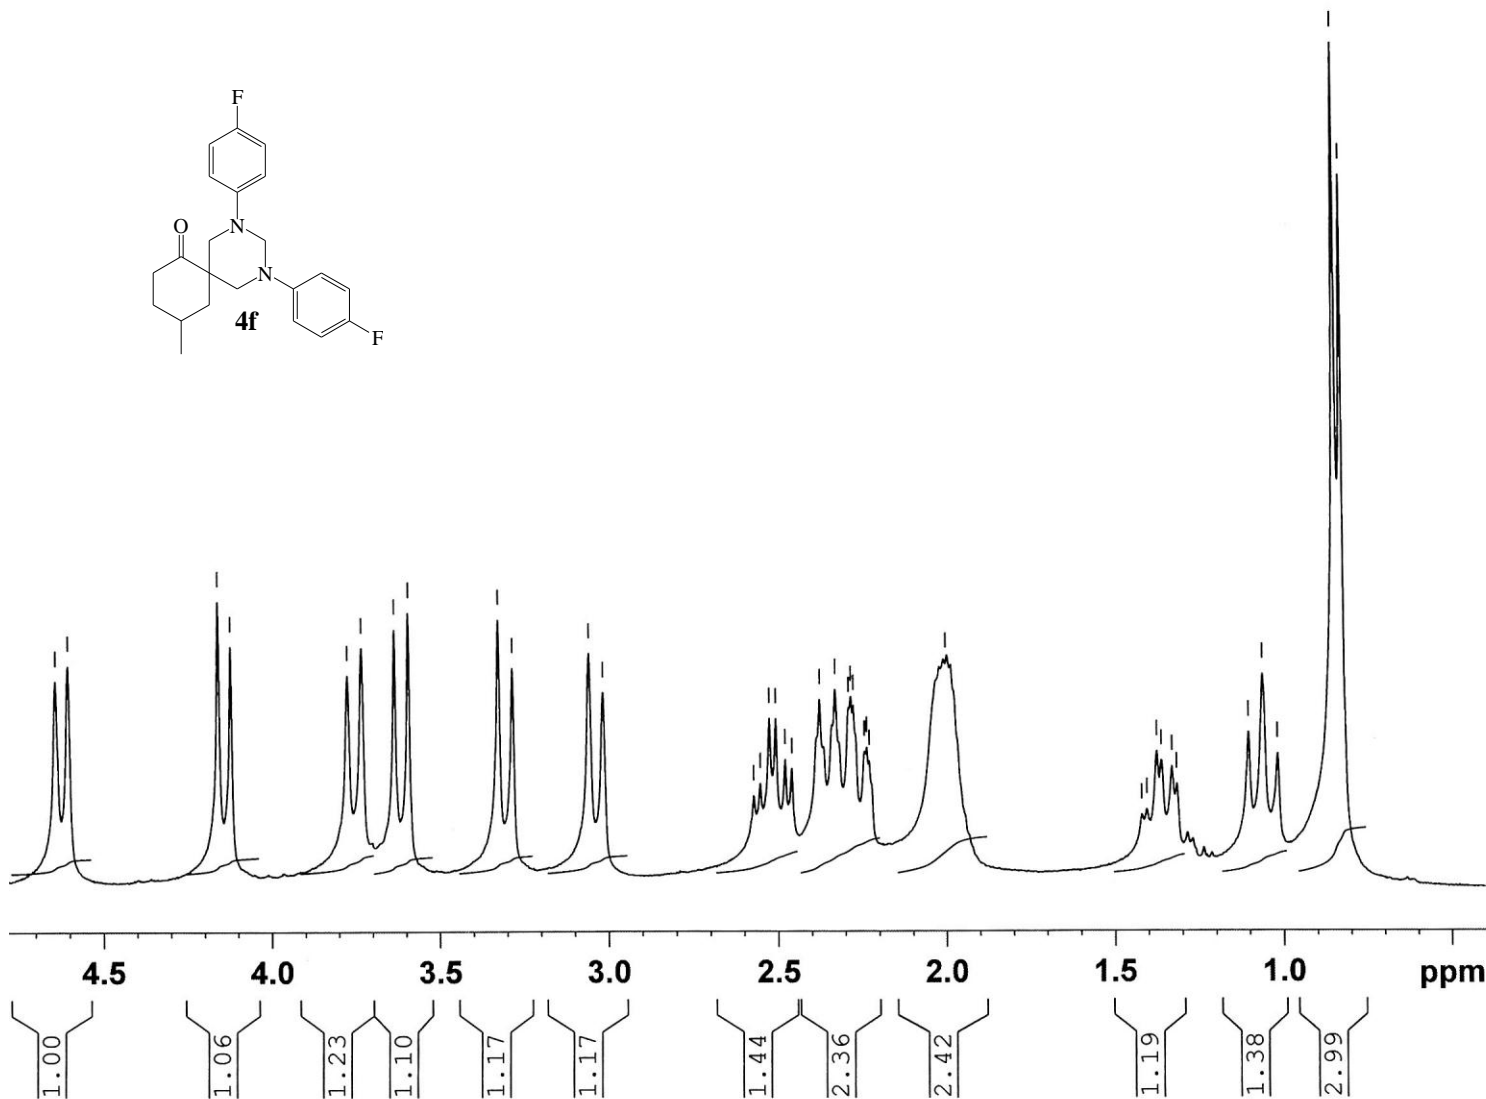

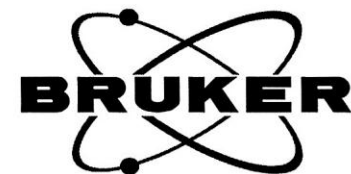

Current Data Parameters  
 NAME carbon  
 EXPNO 9  
 PROCNO 1

F2 - Acquisition Parameters

Date 20120814  
 Time 14.29  
 INSTRUM spect  
 PROBHD 5 mm BBO BB-1H  
 PULPROG zgpg  
 TD 32768  
 SOLVENT CDCl3  
 NS 713  
 DS 4  
 SWH 19531.250 Hz  
 FIDRES 0.596046 Hz  
 AQ 0.8389108 sec  
 RG 71.8  
 DW 25.600 usec  
 DE 6.00 usec  
 TE 292.2 K  
 D1 1.00000000 sec  
 d11 0.03000000 sec  
 DELTA 0.89999998 sec  
 TDO 1

==== CHANNEL f1 =====  
 NUC1 13C  
 P1 9.20 usec  
 PL1 -1.00 dB  
 SFO1 75.4772005 MHz

==== CHANNEL f2 =====  
 CPDPRG2 waltz16  
 NUC2 1H  
 PCPD2 80.00 usec  
 PL12 17.20 dB  
 PL13 20.20 dB  
 PL2 0.00 dB  
 SFO2 300.1315007 MHz

F2 - Processing parameters  
 SI 131072  
 SF 75.4677490 MHz  
 WDW EM  
 SSB 0  
 LB 3.00 Hz  
 GB 0  
 PC 1.40

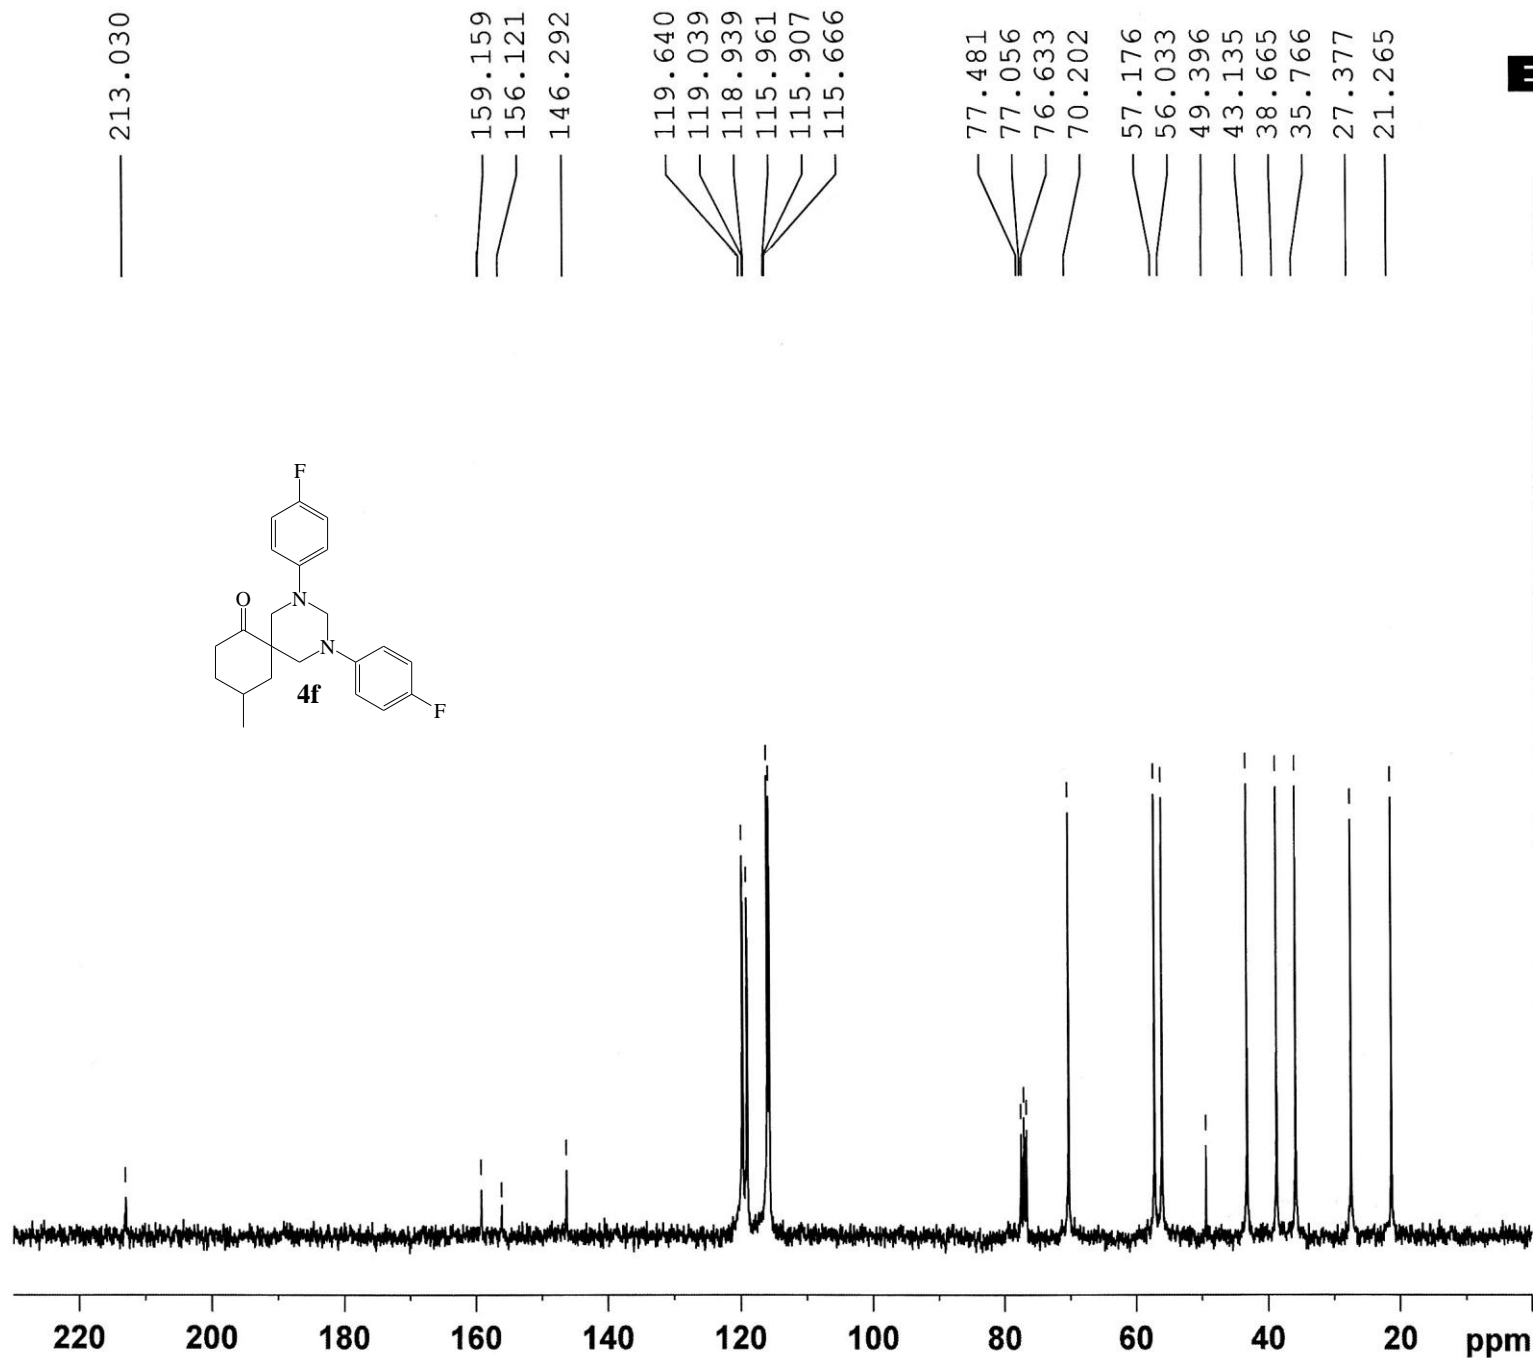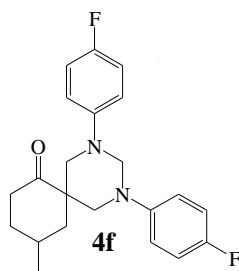

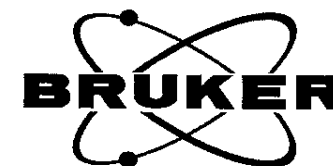

Current Data Parameters  
NAME prasadh  
EXPNO 1940  
PROCNO 1

F2 - Acquisition Parameters  
Date\_ 20110808  
Time\_ 15.13  
INSTRUM spect  
PROBHD 5 mm BBO BB-1H  
PULPROG zg30  
TD 32768  
SOLVENT CDC13  
NS 32  
DS 0  
SWH 4807.692 Hz  
FIDRES 0.146719 Hz  
AQ 3.4079220 sec  
RG 406  
DW 104.000 usec  
DE 6.00 usec  
TE 292.6 K  
D1 1.00000000 sec  
TD0 1

==== CHANNEL f1 =====  
NUC1 1H  
P1 11.00 usec  
PL1 0.00 dB  
SFO1 300.1320008 MHz

F2 - Processing parameters  
SI 16384  
SF 300.1300039 MHz  
WDW EM  
SSB 0  
LB 0.00 Hz  
GB 0  
PC 1.00

7.274  
7.260  
7.245  
7.230  
7.063  
7.052  
7.045  
7.029  
7.023  
7.012  
7.005  
6.990  
6.983  
4.774  
4.735  
4.277  
4.239  
3.861  
3.818  
3.735  
3.693  
3.412  
3.370  
3.162  
3.119  
2.511  
2.491  
2.353  
2.307  
2.295  
2.288  
2.045  
2.035  
2.025  
2.016  
2.006  
1.998  
1.988  
1.136  
1.094  
1.049  
0.865  
0.844

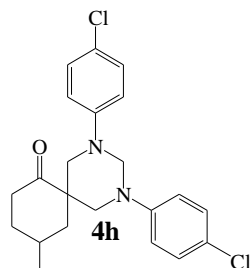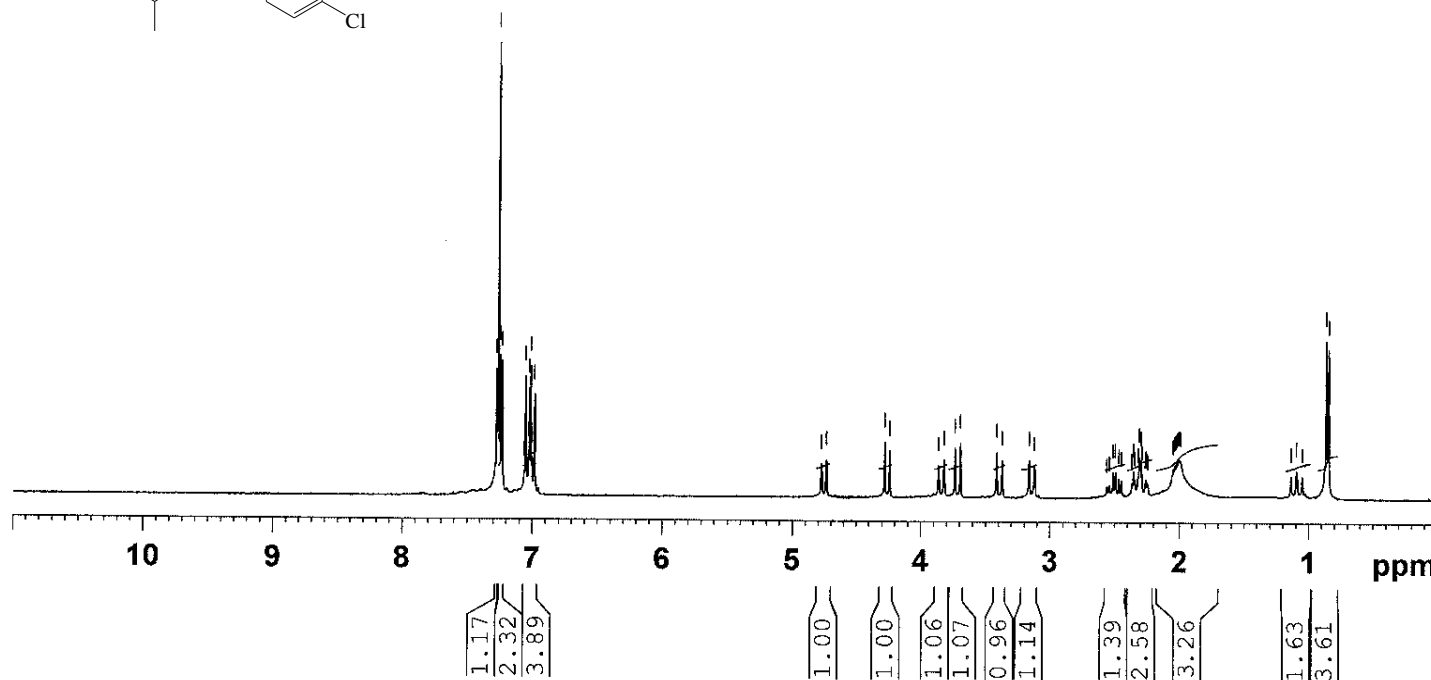



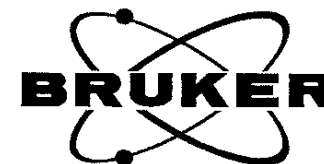

Current Data Parameters  
 NAME prasad C  
 EXPNO 463  
 PROCNO 1

F2 - Acquisition Parameters  
 Date 20110923  
 Time 11.22  
 INSTRUM spect  
 PROBHD 5 mm BBO BB-1H  
 PULPROG zgpg  
 TD 32768  
 SOLVENT CDC13  
 NS 413  
 DS 4  
 SWH 18115.941 Hz  
 FIDRES 0.552855 Hz  
 AQ 0.9044468 sec  
 RG 144  
 DW 27.600 usec  
 DE 6.00 usec  
 TE 292.6 K  
 D1 1.00000000 sec  
 d11 0.03000000 sec  
 DELTA 0.89999998 sec  
 TDO 1

==== CHANNEL f1 =====  
 NUC1 13C  
 P1 9.20 usec  
 PL1 -1.00 dB  
 SFO1 75.4760505 MHz

==== CHANNEL f2 =====  
 CPDPRG2 waltz16  
 NUC2 1H  
 PCPD2 80.00 usec  
 PL12 17.20 dB  
 PL13 20.20 dB  
 PL2 0.00 dB  
 SFO2 300.1315007 MHz

F2 - Processing parameters  
 SI 131072  
 SF 75.4677528 MHz  
 WDW EM  
 SSB 0  
 LB 3.00 Hz  
 GB 0  
 PC 1.40

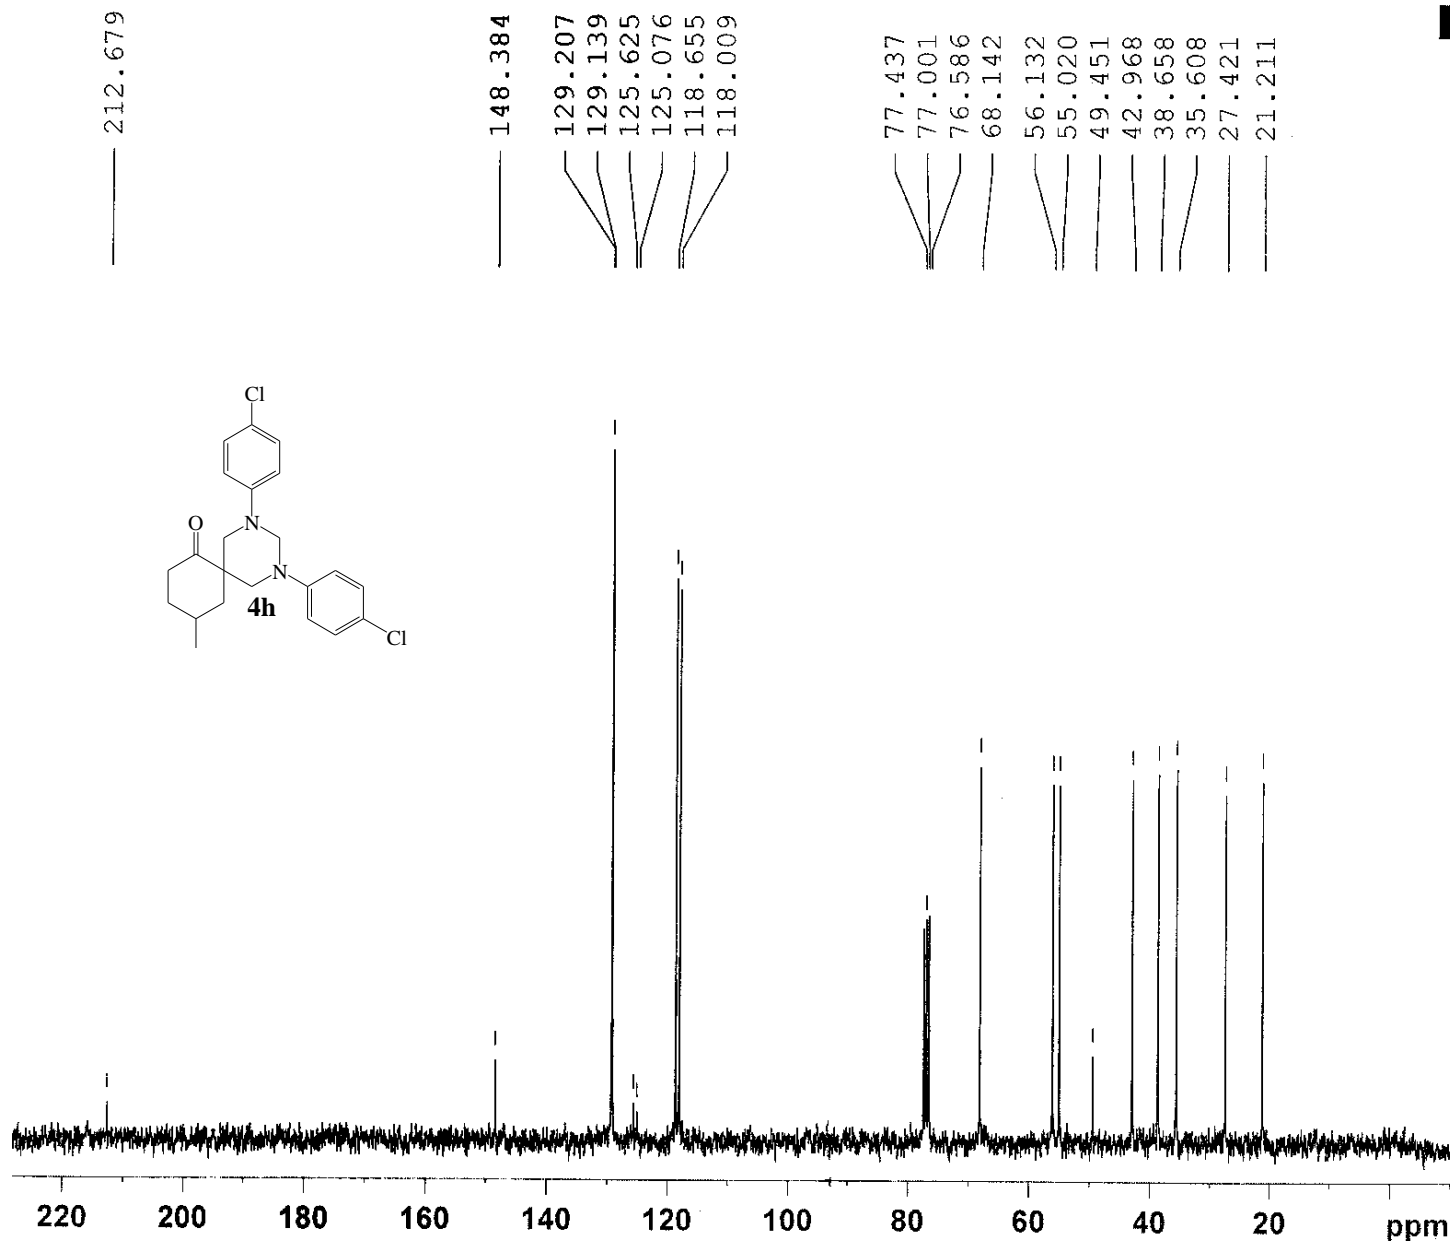

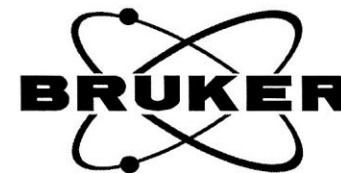

Current Data Parameters  
NAME proton  
EXPNO 202  
PROCNO 1

F2 - Acquisition Parameters  
Date\_ 20120814  
Time\_ 14.51  
INSTRUM spect  
PROBHD 5 mm BBO BB-1H  
PULPROG zg30  
TD 32768  
SOLVENT CDC13  
NS 20  
DS 0  
SWH 4807.692 Hz  
FIDRES 0.146719 Hz  
AQ 3.4079220 sec  
RG 80.6  
DW 104.000 usec  
DE 6.00 usec  
TE 291.8 K  
D1 1.0000000 sec  
TD0 1

===== CHANNEL f1 =====  
NUC1 1H  
P1 11.00 usec  
PL1 0.00 dB  
SFO1 300.1320008 MHz

F2 - Processing parameters  
SI 16384  
SF 300.1300022 MHz  
WDW EM  
SSB 0  
LB 0.00 Hz  
GB 0  
PC 1.00

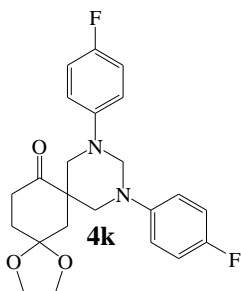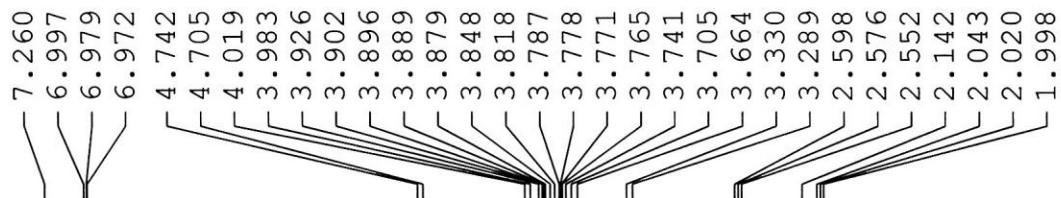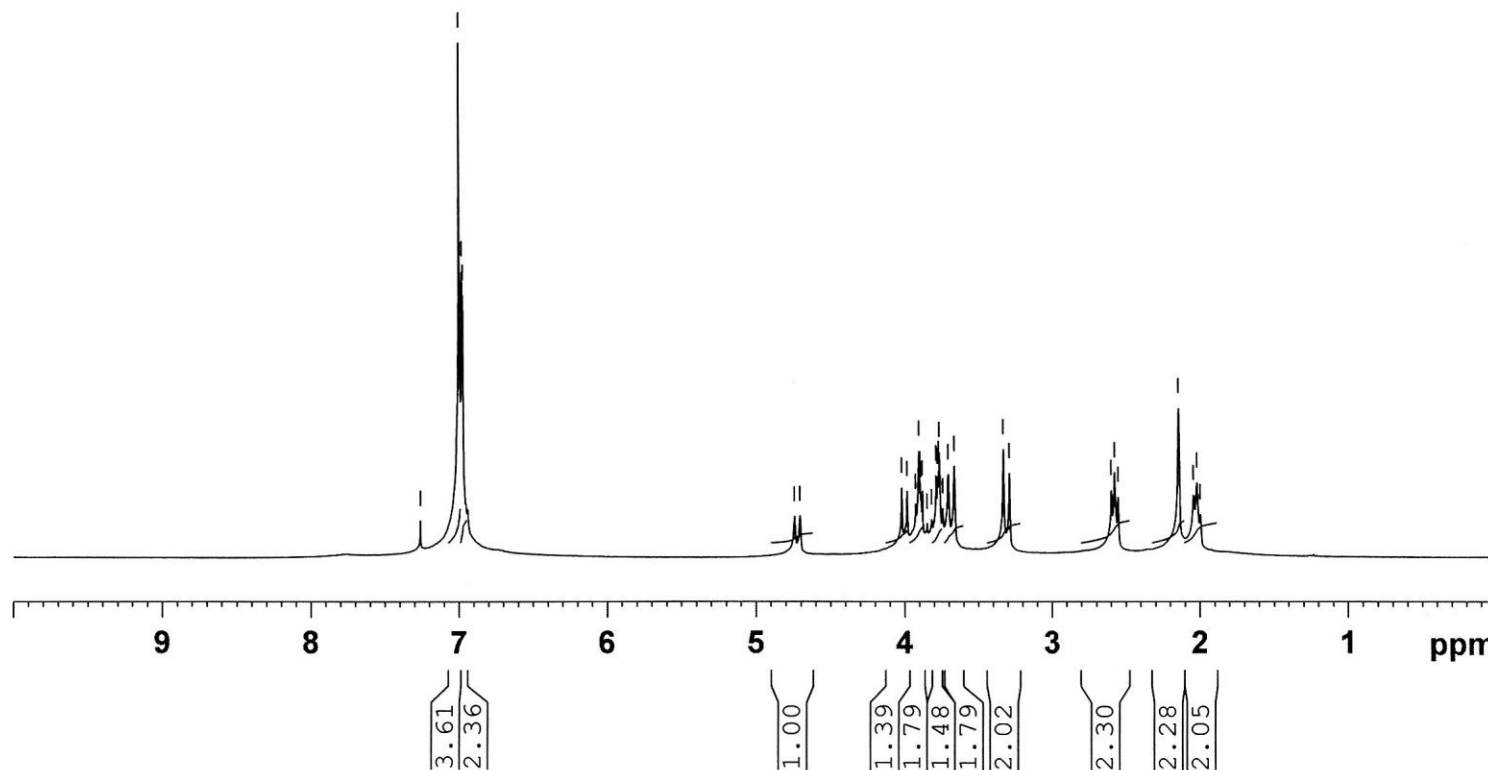

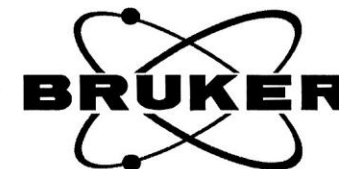

Current Data Parameters  
NAME carbon  
EXPNO 10  
PROCNO 1

F2 - Acquisition Parameters  
Date\_ 20120814  
Time\_ 14.56  
INSTRUM spect  
PROBHD 5 mm BBO BB-1H  
PULPROG zgpg  
TD 32768  
SOLVENT CDCl3  
NS 416  
DS 4  
SWH 19531.250 Hz  
FIDRES 0.596046 Hz  
AQ 0.8389108 sec  
RG 71.8  
DW 25.600 usec  
DE 6.00 usec  
TE 292.3 K  
D1 1.00000000 sec  
d11 0.03000000 sec  
DELTA 0.89999998 sec  
TDO 1

===== CHANNEL f1 =====  
NUC1 13C  
P1 9.20 usec  
PL1 -1.00 dB  
SFO1 75.4772005 MHz

===== CHANNEL f2 =====  
CPDPRG2 waltz16  
NUC2 1H  
PCPD2 80.00 usec  
PL12 17.20 dB  
PL13 20.20 dB  
PL2 0.00 dB  
SFO2 300.1315007 MHz

F2 - Processing parameters  
SI 131072  
SF 75.4677490 MHz  
WDW EM  
SSB 0  
LB 2.00 Hz  
GB 0  
PC 1.40

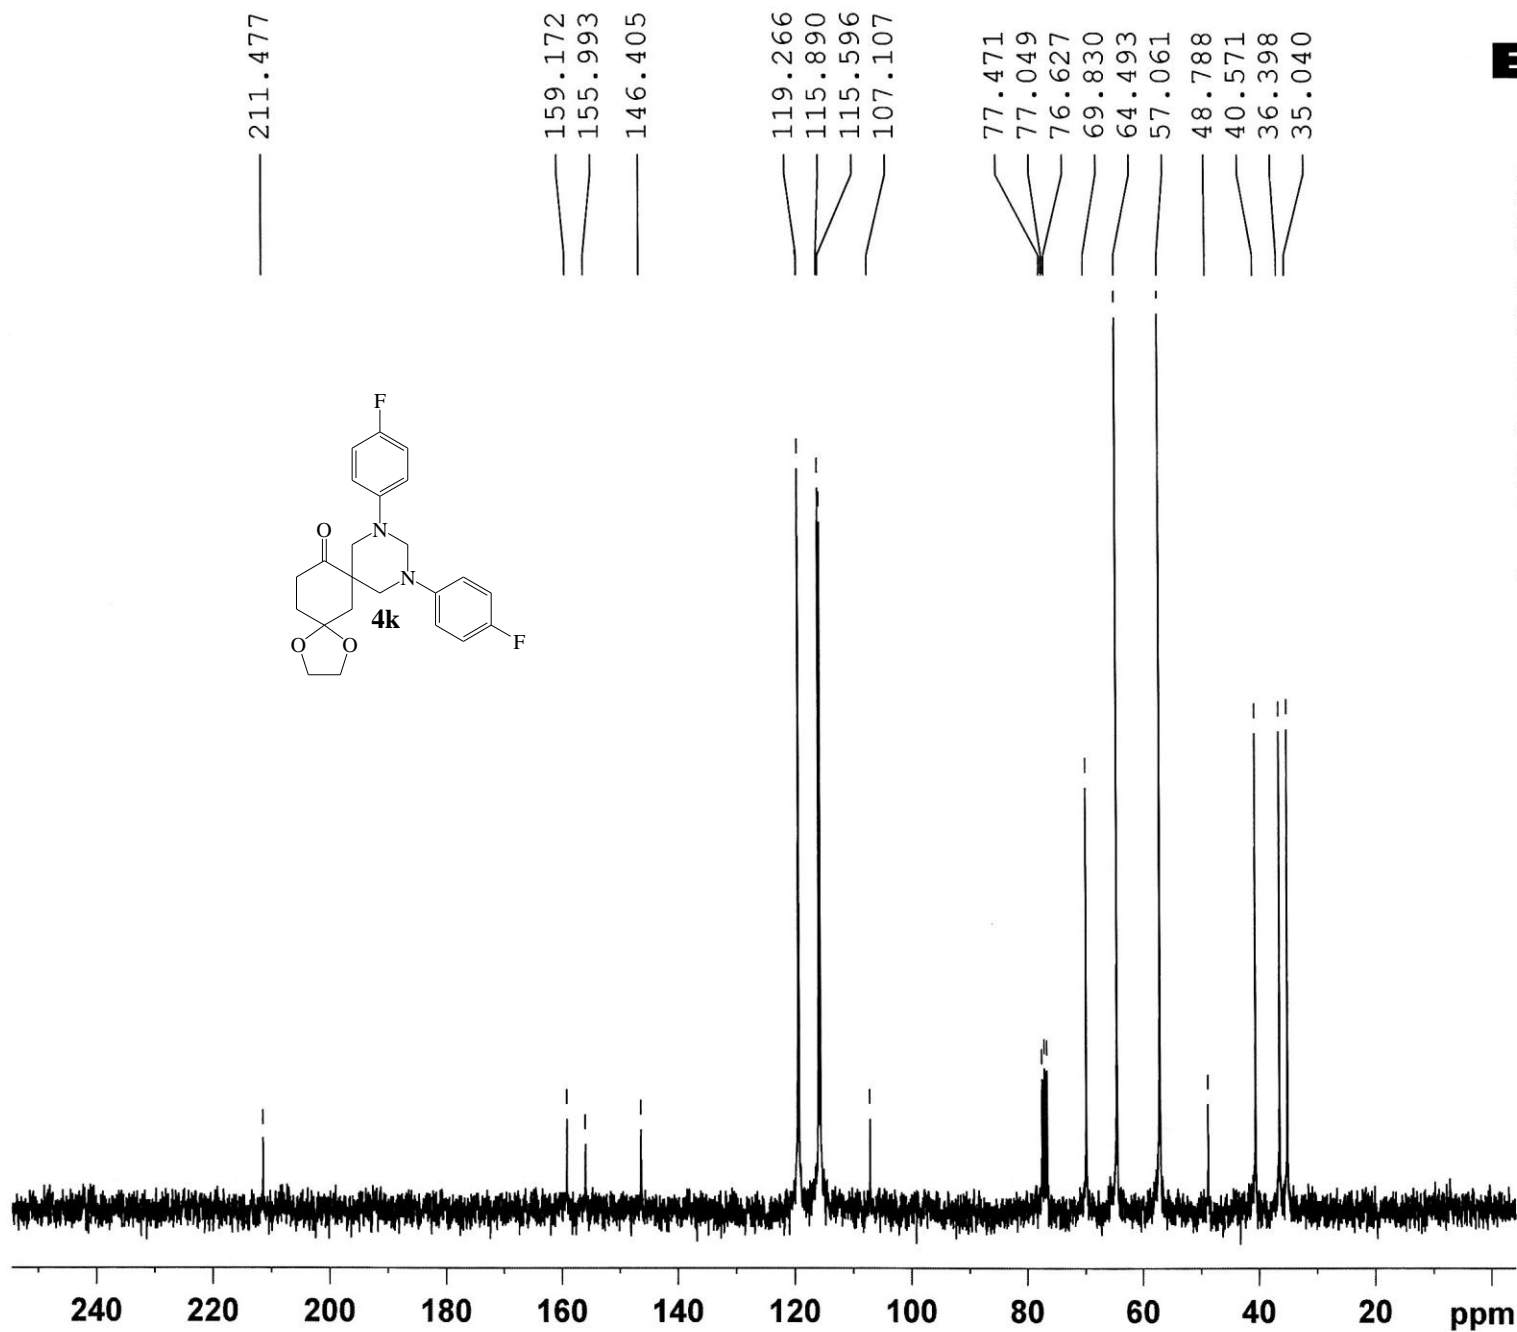

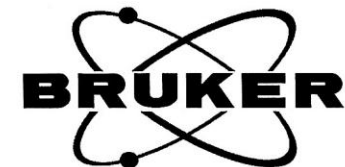

Current Data Parameters  
NAME proton  
EXPNO 203  
PROCNO 1

F2 - Acquisition Parameters  
Date\_ 20120814  
Time\_ 15.11  
INSTRUM spect  
PROBHD 5 mm BBO BB-1H  
PULPROG zg30  
TD 32768  
SOLVENT CDCl3  
NS 33  
DS 0  
SWH 4807.692 Hz  
FIDRES 0.146719 Hz  
AQ 3.4079220 sec  
RG 80.6  
DW 104.000 usec  
DE 6.00 usec  
TE 292.0 K  
D1 1.0000000 sec  
TD0 1

===== CHANNEL f1 =====  
NUC1 1H  
P1 11.00 usec  
PL1 0.00 dB  
SFO1 300.1320008 MHz

F2 - Processing parameters  
SI 16384  
SF 300.1300022 MHz  
WDW EM  
SSB 0  
LB 0.00 Hz  
GB 0  
PC 1.00

7.391  
7.362  
7.260  
6.592  
6.563  
4.056  
4.049  
4.039  
4.029  
4.022  
3.449  
3.425  
3.403  
3.379  
3.224  
3.210  
3.178  
3.164  
2.978  
2.677  
2.655  
2.431  
2.421  
2.414  
2.404  
2.373  
2.138  
2.126  
2.118  
2.107  
2.094  
2.083  
2.066  
2.057  
2.046  
2.035  
2.024  
2.015

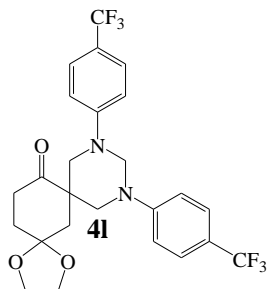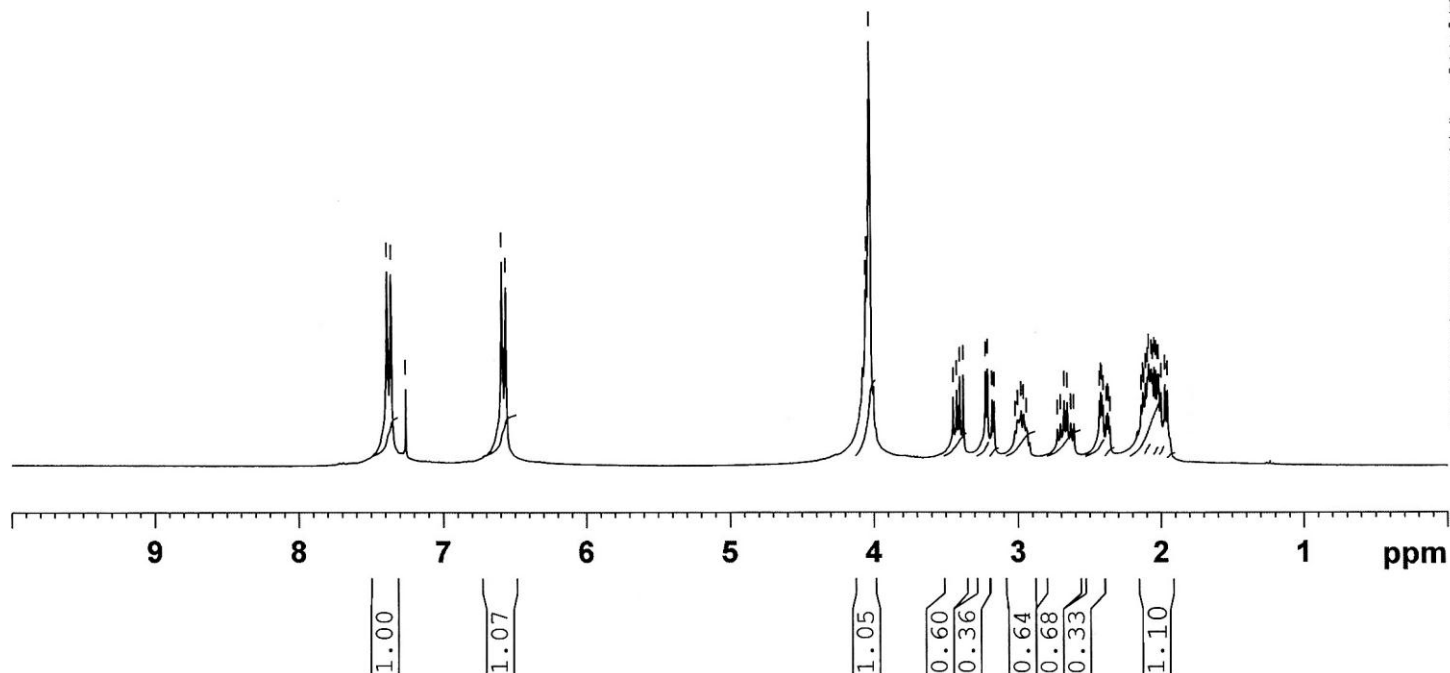

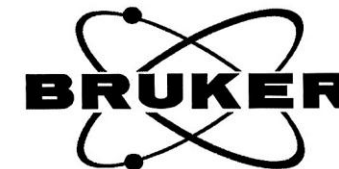

211.578

150.294

126.686  
126.639

111.968  
107.097

77.471  
77.042  
76.619  
64.889  
64.707  
48.948  
46.002  
43.060  
38.732  
38.362  
34.461

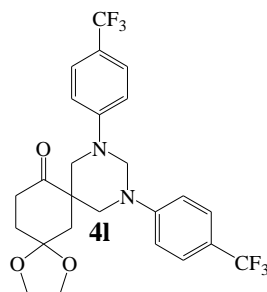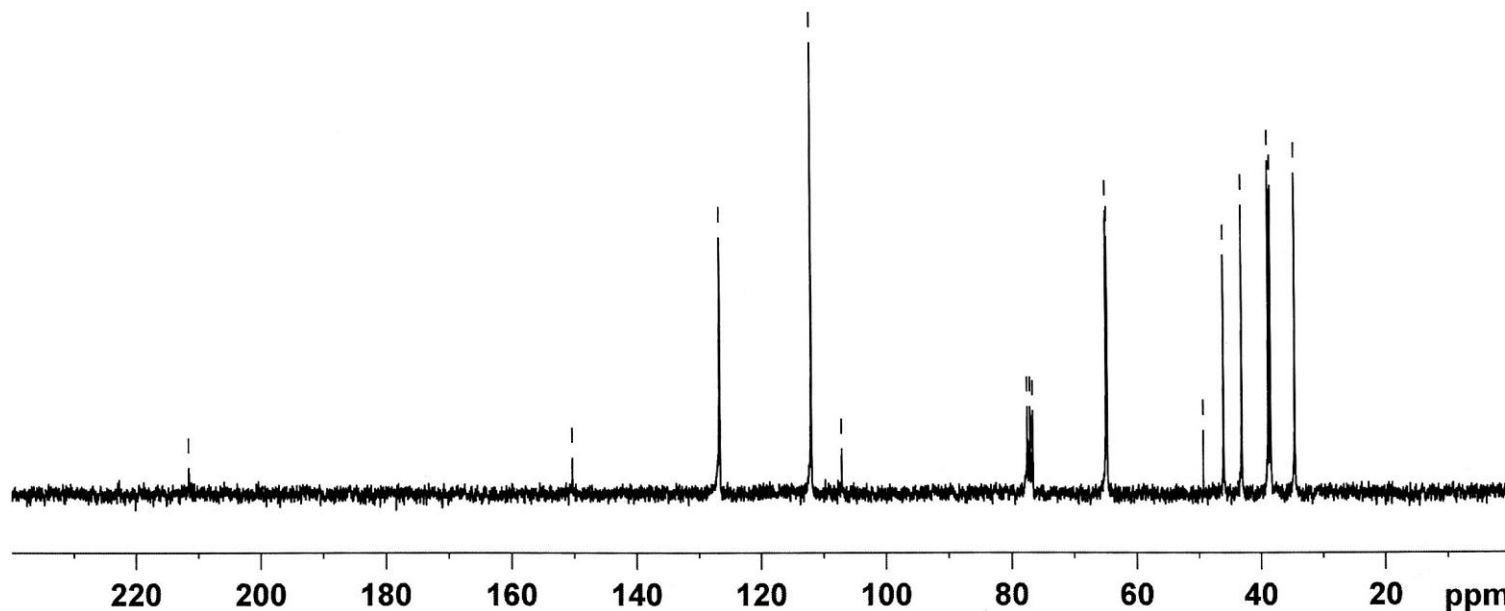

Current Data Parameters  
NAME carbon  
EXPNO 11  
PROCNO 1

F2 - Acquisition Parameters

Date 20120814  
Time 15.14  
INSTRUM spect  
PROBHD 5 mm BBO BB-1H  
PULPROG zgpg  
TD 32768  
SOLVENT CDC13  
NS 471  
DS 4  
SWH 19531.250 Hz  
FIDRES 0.596046 Hz  
AQ 0.8389108 sec  
RG 71.8  
DW 25.600 usec  
DE 6.00 usec  
TE 292.0 K  
D1 1.00000000 sec  
d11 0.03000000 sec  
DELTA 0.89999998 sec  
TDO 1

==== CHANNEL f1 =====  
NUC1 13C  
P1 9.20 usec  
PL1 -1.00 dB  
SFO1 75.4772005 MHz

==== CHANNEL f2 =====  
CPDPRG2 waltz16  
NUC2 1H  
PCPD2 80.00 usec  
PL12 17.20 dB  
PL13 20.20 dB  
PL2 0.00 dB  
SFO2 300.1315007 MHz

F2 - Processing parameters  
SI 131072  
SF 75.4677490 MHz  
WDW EM  
SSB 0  
LB 2.00 Hz  
GB 0  
PC 1.40

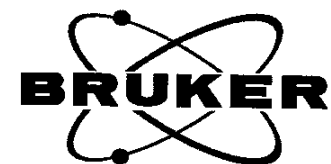

Current Data Parameters  
NAME prasadh  
EXPNO 1941  
PROCNO 1

F2 - Acquisition Parameters  
Date\_ 20110808  
Time\_ 15.21  
INSTRUM spect  
PROBHD 5 mm BBO BB-1H  
PULPROG zg30  
TD 32768  
SOLVENT CDCl3  
NS 32  
DS 0  
SWH 4807.692 Hz  
FIDRES 0.146719 Hz  
AQ 3.4079220 sec  
RG 406  
DW 104.000 usec  
DE 6.00 usec  
TE 293.0 K  
D1 1.00000000 sec  
TD0 1

==== CHANNEL f1 =====  
NUC1 1H  
P1 11.00 usec  
PL1 0.00 dB  
SFO1 300.132008 MHz

F2 - Processing parameters  
SI 16384  
SF 300.1300051 MHz  
WDW EM  
SSB 0  
LB 0.00 Hz  
GB 0  
PC 1.00

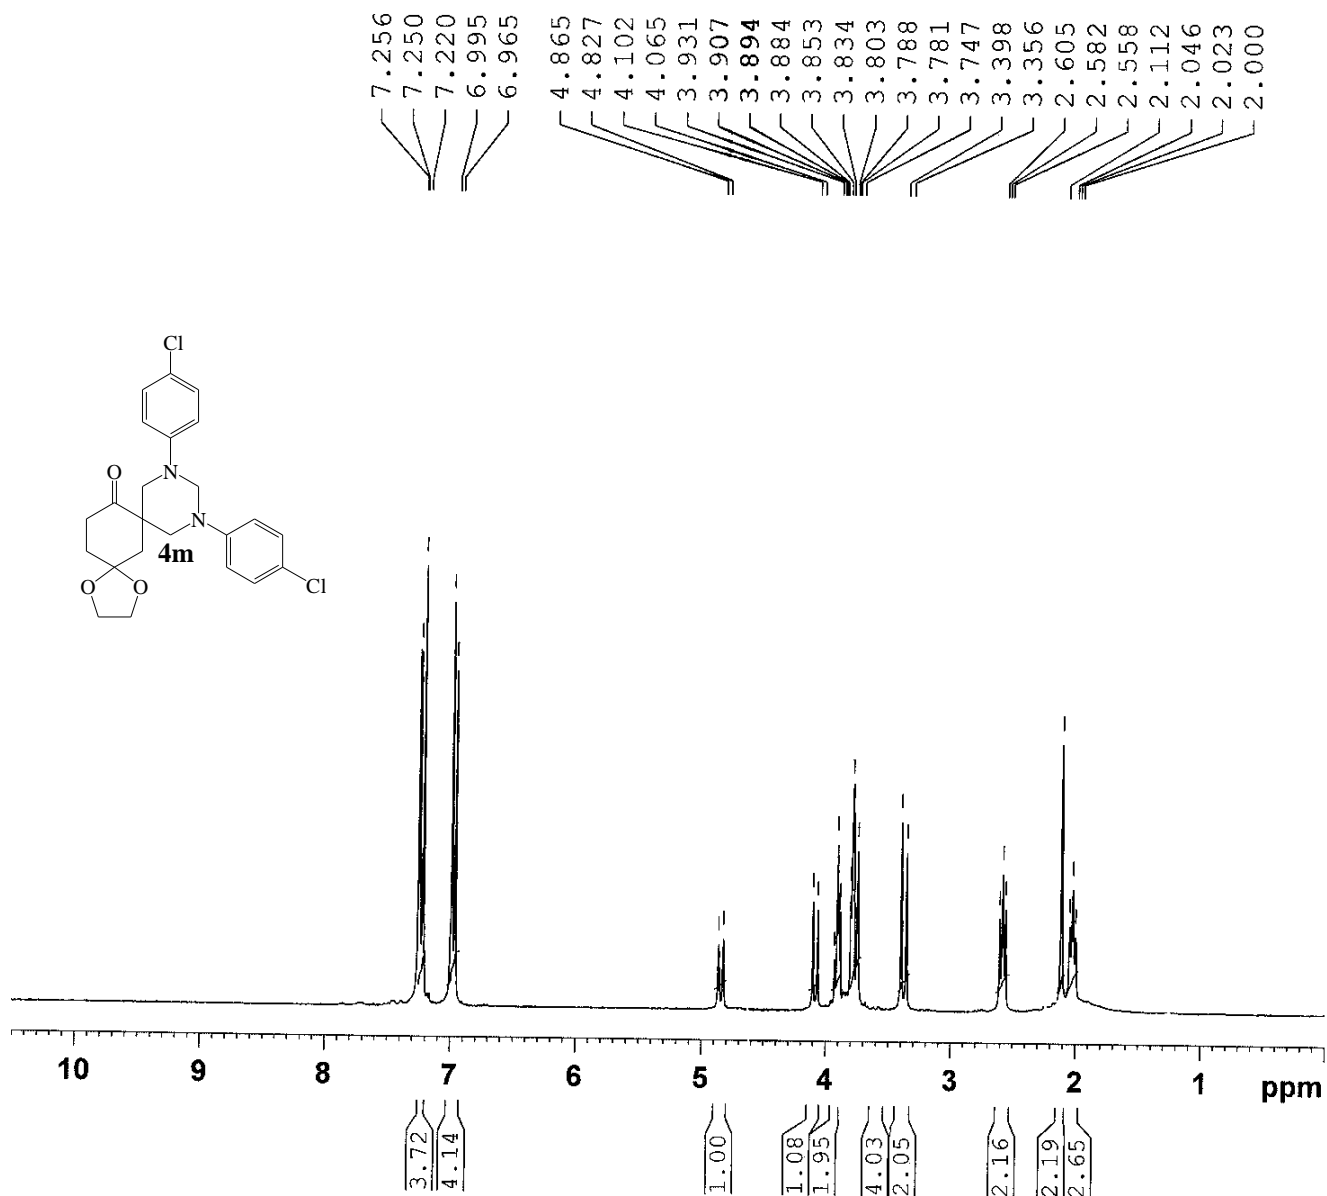

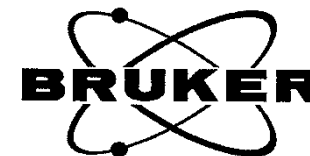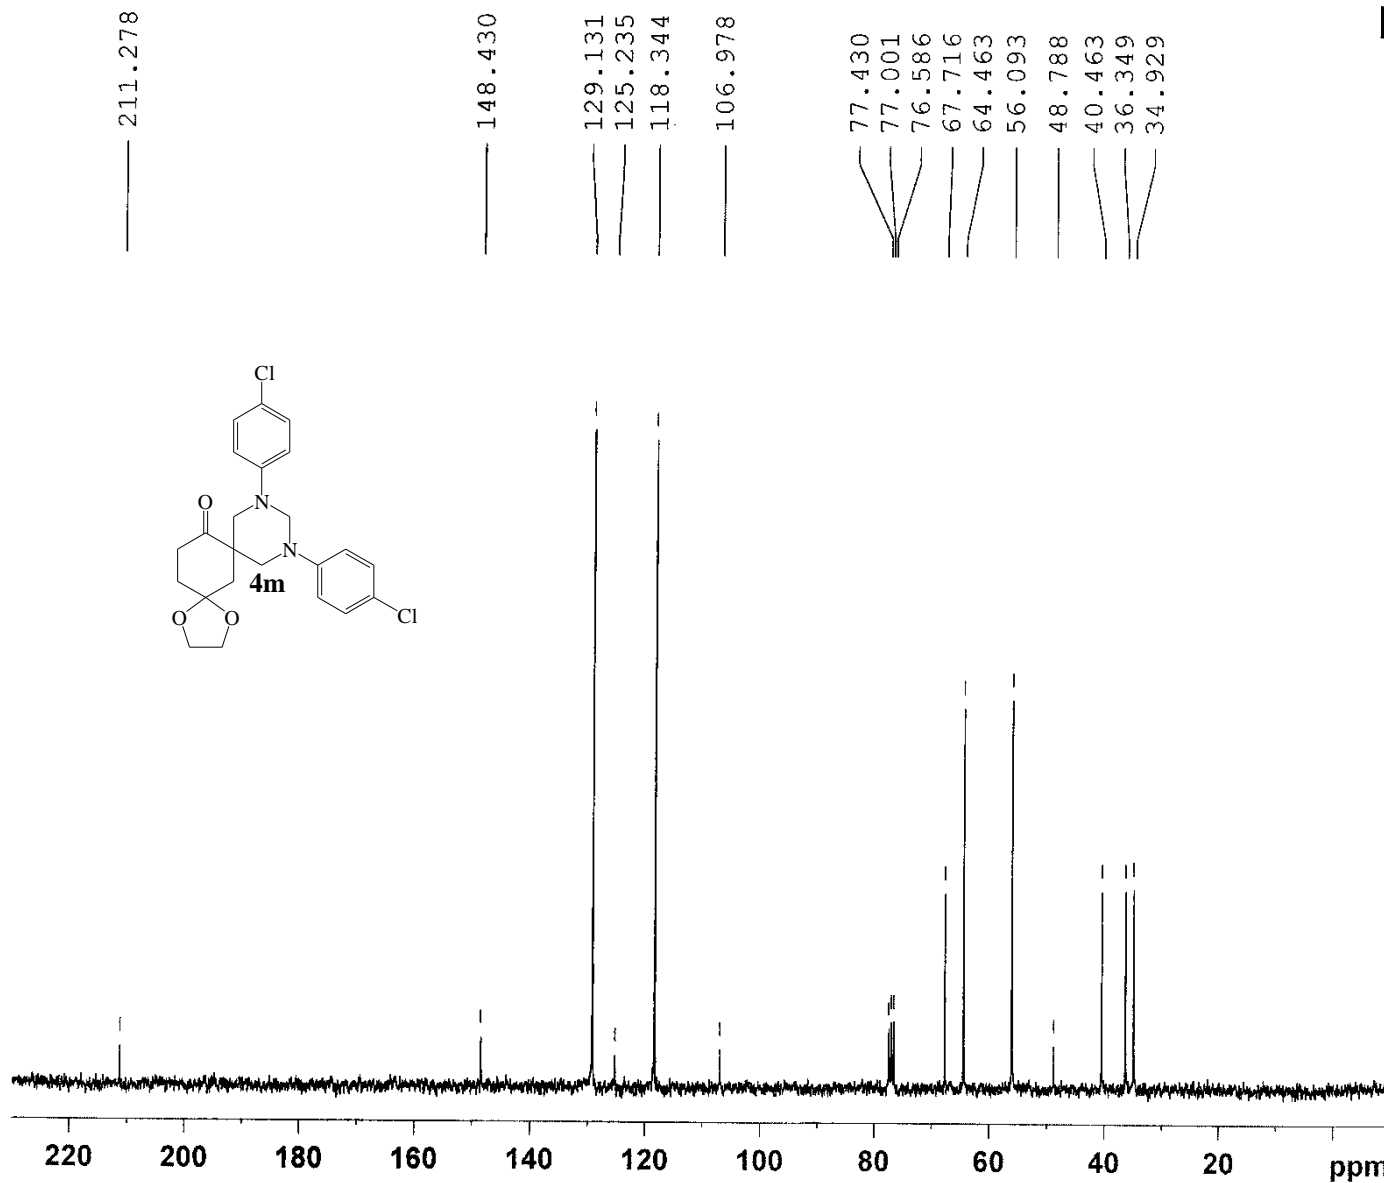

Current Data Parameters  
NAME prasad C  
EXPNO 464  
PROCNO 1

F2 - Acquisition Parameters  
Date\_ 20110923  
Time\_ 11.39  
INSTRUM spect  
PROBHD 5 mm BBO BB-1H  
PULPROG zgpg  
TD 32768  
SOLVENT CDCl3  
NS 167  
DS 4  
SWH 18115.941 Hz  
FIDRES 0.552855 Hz  
AQ 0.9044468 sec  
RG 144  
DW 27.600 usec  
DE 6.00 usec  
TE 293.0 K  
D1 1.0000000 sec  
d11 0.0300000 sec  
DELTA 0.89999998 sec  
TDO 1

==== CHANNEL f1 =====  
NUC1 13C  
P1 9.20 usec  
PL1 -1.00 dB  
SFO1 75.4760505 MHz

==== CHANNEL f2 =====  
CPDPRG2 waltz16  
NUC2 1H  
PCPD2 80.00 usec  
PL12 17.20 dB  
PL13 20.20 dB  
PL2 0.00 dB  
SFO2 300.1315007 MHz

F2 - Processing parameters  
SI 131072  
SF 75.4677532 MHz  
WDW EM  
SSB 0  
LB 3.00 Hz  
GB 0  
PC 1.40

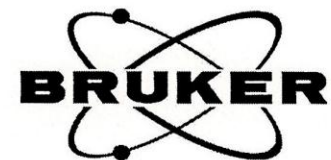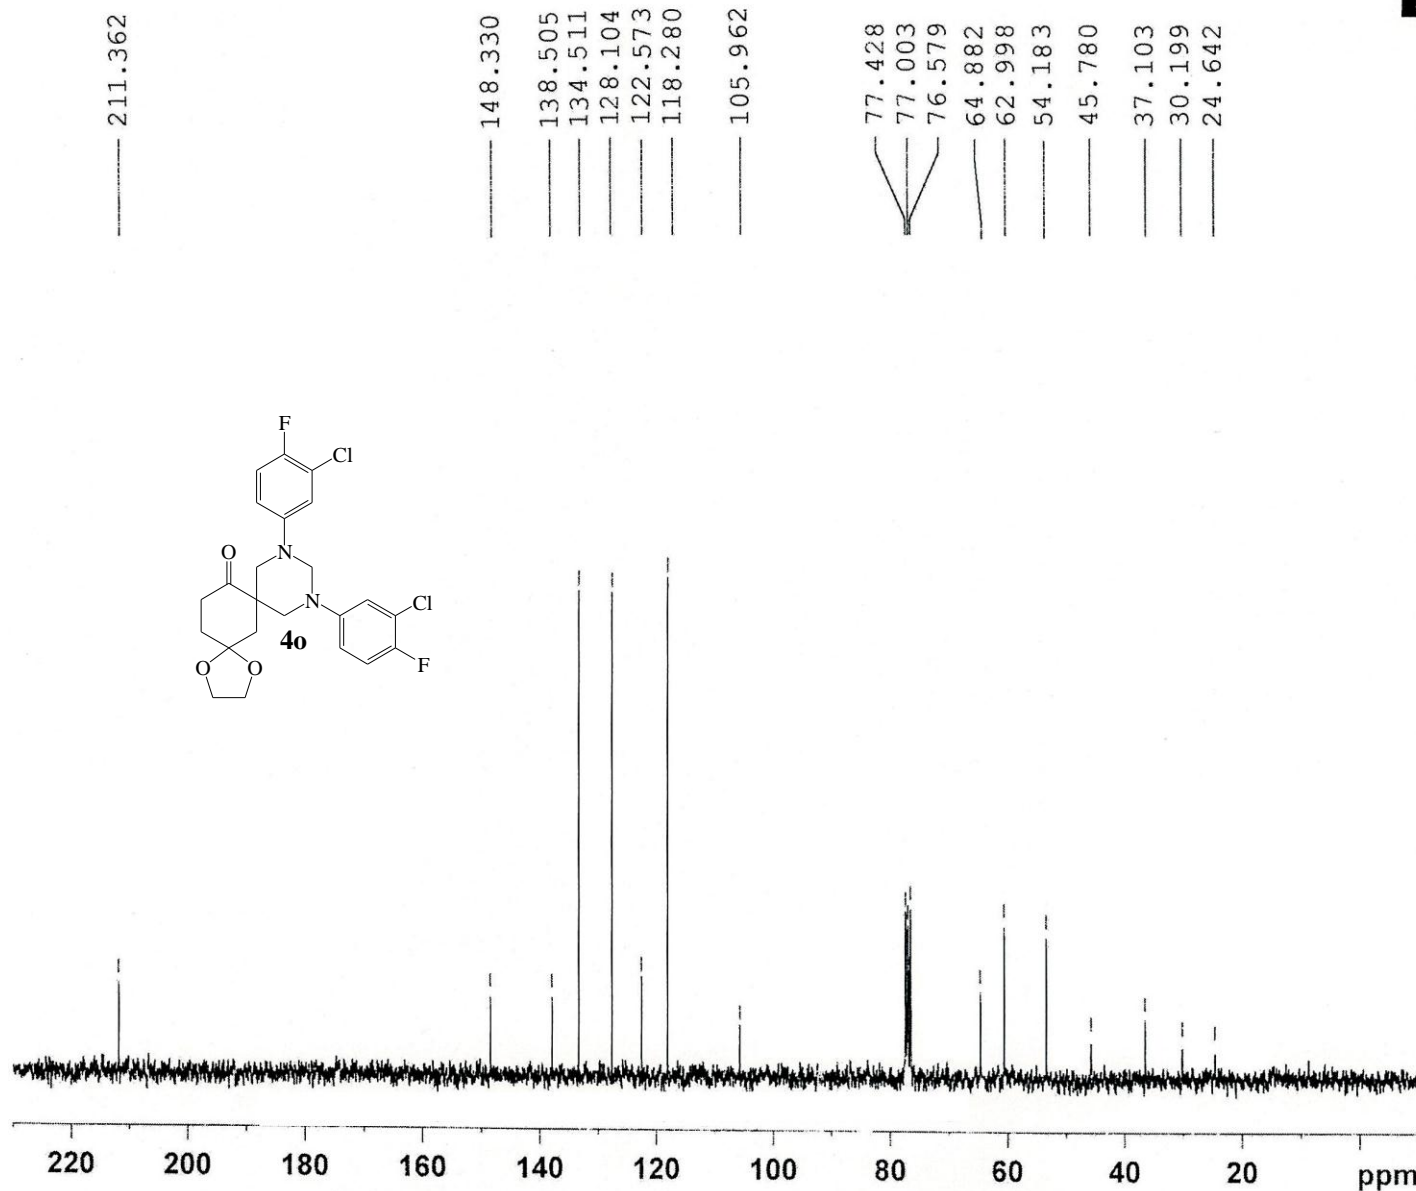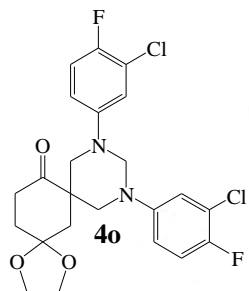

Current Data Parameters  
NAME prasad C  
EXPNO 467  
PROCNO 1

F2 - Acquisition Parameters

Date 20110923  
Time 13.10  
INSTRUM spect  
PROBHD 5 mm BBO BB-1H  
PULPROG zgpg  
TD 32768  
SOLVENT CDCl3  
NS 512  
DS 4  
SWH 18115.941 Hz  
FIDRES 0.552855 Hz  
AQ 0.9044468 sec  
RG 144  
DW 27.600 usec  
DE 6.00 usec  
TE 293.0 K  
D1 1.00000000 sec  
d11 0.03000000 sec  
DELTA 0.89999998 sec  
TD0 1

==== CHANNEL f1 =====  
NUC1 13C  
P1 9.20 usec  
PL1 -1.00 dB  
SFO1 75.4760505 MHz

==== CHANNEL f2 =====  
CPDPRG2 waltz16  
NUC2 1H  
PCPD2 80.00 usec  
PL12 17.20 dB  
PL13 20.20 dB  
PL2 0.00 dB  
SFO2 300.1315007 MHz

F2 - Processing parameters  
SI 131072  
SF 75.4677506 MHz  
WDW EM  
SSB 0  
LB 3.00 Hz  
GB 0  
PC 1.40



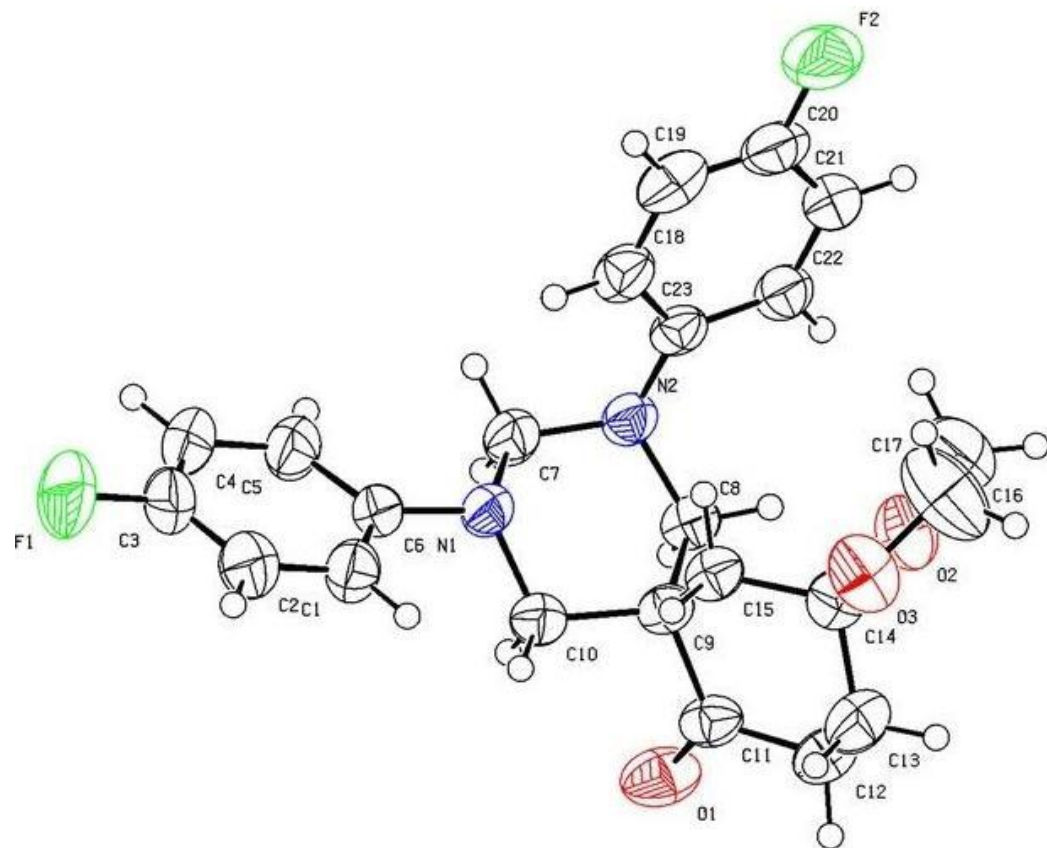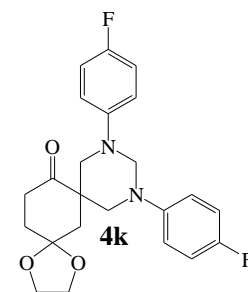

(CCDC 897553)
